# Supplementary material for: Urbanization-induced urban heat island and aerosol effects on climate extremes in the Yangtze River Delta Region of China
Source: Copernicus journal article supplement (doi:10.5194/acp-2016-953), 2016-12-22
Supplement: Supplementary file [file acp-2016-953-AC1-supplement.zip]

# Urbanization-induced urban heat island and aerosol effects on climate extremes in the Yangtze River Delta Region of China

Shi Zhong<sup>1, 2</sup>, Yun Qian<sup>2\*</sup>, Chun Zhao<sup>2, 6</sup>, Ruby Leung<sup>2</sup>, Hailong Wang<sup>2</sup>, Ben Yang<sup>3, 2</sup>, Jiwen  
Fan<sup>2</sup>, Huiping Yan<sup>4, 2</sup>, Xiu-Qun Yang<sup>3</sup>, and Dongqing Liu<sup>5</sup>

<sup>1</sup> State Key Laboratory of Hydrology-Water Resources and Hydraulic Engineering, Center for  
Global Change and Water Cycle, Hohai University, Nanjing, China

<sup>2</sup> Pacific Northwest National Laboratory, Richland, WA, USA

<sup>3</sup> School of Atmospheric Sciences, Nanjing University, Nanjing, China

<sup>4</sup> College of Atmospheric Science, Nanjing University of Information & Technology, Nanjing,  
China

<sup>5</sup> Nanjing Meteorological Bureau, Nanjing, China

<sup>6</sup> University of Science and Technology of China, Hefei, China

Corresponding author: Yun Qian [Yun.Qian@pnnl.gov]

Submitted to *Atmospheric Chemistry and Physics*

October 1, 2016

## Abstract

The WRF-Chem model coupled with a single-layer Urban Canopy Model (UCM) is integrated for 5 years at convection-permitting scale to investigate the individual and combined impacts of urbanization-induced changes in land cover and pollutants emission on regional climate in the Yangtze River Delta (YRD) region in eastern China. Simulations with the urbanization effects reasonably reproduced the observed features of temperature and precipitation in the YRD region. Urbanization over the YRD induces an Urban Heat Island (UHI) effect, which increases the surface temperature by 0.53 °C in summer and increases the annual heat wave days at a rate of 3.7 d/yr in the major megacities in the YRD, accompanied by intensified heat stress. In winter, the near-surface air temperature increases by approximately 0.7 °C over commercial areas in the cities but decreases in the surrounding areas. Radiative effects of aerosols tend to cool the surface air by reducing net shortwave radiation at the surface. Compared to the more localized UHI effect, aerosol effects on solar radiation and temperature influence a much larger area, especially downwind of the city-cluster in the YRD.

Results also show that the UHI increases the frequency of extreme summer precipitation by strengthening the convergence and updrafts over urbanized areas in the afternoon, which favor the development of deep convection. In contrast, the radiative forcing of aerosols results in a surface cooling and upper atmospheric heating, which enhances atmospheric stability and suppresses convection. The combined effects of the UHI and aerosols on precipitation depend on synoptic conditions. Two rainfall events under two typical but different synoptic weather patterns are further analyzed. It is shown that the impact of urban land-cover and aerosols on precipitation is not only determined by their influence on local convergence, but also modulated by large-scale weather systems. For the case with a strong synoptic forcing associated with stronger winds and

larger spatial convergence, the UHI and aerosol effects are relatively weak. When the synoptic forcing is weak, however, the UHI and aerosol effects on local convergence dominate. This suggests that synoptic forcing plays a significant role in modulating the urbanization-induced land-cover and aerosol effects on individual rainfall event. Hence precipitation changes due to urbanization effects may offset each other under different synoptic conditions, resulting in little changes in mean precipitation at longer time scales.

## 1. Introduction

Urbanization affects climate and hydrological cycle by changing land cover and surface albedo, which releases additional heat to the atmosphere, and by emitting air pollutants, which interact with clouds and radiation (e.g., Shepherd, 2005; Sen Roy and Yuan, 2009; Yang et al., 2011). The most discernible impact of urban land-use change is the urban heat island (UHI) effect that can result in a warmer environment over urban areas than the surrounding areas (Landsberg, 1981; Oke, 1987). In addition to the thermal perturbations, the UHI has been well documented to modify wind patterns (Hjemfelt, 1982), evaporation (Wienert and Kuttler, 2005), atmospheric circulations (Shepherd and Burian, 2003; Baik et al., 2007; Lei et al., 2008), and precipitation around urban areas (Braham, 1979; Inoue and Kimura, 2004). Previous studies have found an increase of warm-season precipitation over and downwind of major cities due to the expanded urban land cover (Huff and Changnon, 1972; Changnon, 1979; Zhong et al., 2015). Recent studies suggested that the underlying urban surface also affects the initiation and propagation of storms (Bornstein and Lin, 2000; Guo et al., 2006) and convective activities in city fringes (Baik et al., 2007; Shepherd et al., 2010).

Concurrently increases in population and anthropogenic activities over urbanized areas increase pollutant emissions and aerosol loading in the atmosphere. Atmospheric aerosols have long been recognized to affect surface and top of the atmosphere (TOA) radiative fluxes and radiative heating profiles in the atmosphere via aerosol-radiation interactions (ARI) (e.g., Coakley et al., 1987; Charlson et al., 1992; Hansen et al., 1997; Yu et al., 2006; Qian et al., 2006, 2007, 2015; McFarquhar and Wang, 2006), which tend to induce cooling near the surface and heating at the low and mid-troposphere (Qian et al., 2006; Bauer and Mennon, 2012). Anthropogenic aerosols can also affect clouds and precipitation via aerosol-cloud interactions (ACI) (e.g., Rosenfeld, 2000,

2008; Qian et al., 2010; Fan et al., 2013; 2015; Tao et al., 2012; Zhong et al., 2015). Localized changes in precipitation by strong aerosol perturbations can induce cold pools by evaporation, which may alter the organization of stratocumulus clouds (e.g., Wang and Feingold, 2009; Feingold et al., 2010). Aerosol impacts on deep convective clouds are complicated by the interactions among dynamical, thermodynamical, and microphysical processes. For example, deep convection could be invigorated by aerosols as more cloud water associated with the smaller cloud drops is carried to higher levels where it freezes and releases more latent heat in a polluted environment (Rosenfeld, 2008; Khain, 2009; Storer and van den Heever, 2013). Fan et al. (2013) revealed a microphysical effect of aerosols from reduced fall velocity of ice particles that explains the commonly observed increases in cloud top height and cloud cover in polluted environments. Therefore, urbanization may influence precipitation and circulation through multiple pathways that are more difficult to disentangle than the dominant effect on temperature.

As one of the most developed regions in China, the Yangtze River Delta (YRD) has been experiencing rapid economic growth and intensive urbanization process during the past three decades. With the highest city density and urbanization level in China, the YRD has become the largest adjacent metropolitan areas in the world. It covers an area of  $9.96 \times 10^4 \text{ km}^2$ , with a total urban area of  $4.19 \times 10^3 \text{ km}^2$  (Hu et al., 2009). Observations have shown that the urban land-use expansion in this region has induced a remarkable warming due to the significant UHI effect (Du et al., 2006; Wu and Yang 2012, Wang et al., 2015). The annual mean warming reached up to  $0.16^\circ\text{C}/10\text{yr}$  based on station measurements in large cities (Ren et al., 2008), which accounted for 47.1% of the overall warming during the period of 1961-2000. Urbanization in the YRD was found to destabilize the atmospheric boundary layer (Zhang et al., 2010) and enhance convection and precipitation (Yang et al., 2012, Wan et al., 2013). Meanwhile, human activities associated with

the ever-growing population have led to a dramatic increase in air pollutant emissions (Wang et al., 2006). Several observational and numerical studies have revealed that additional aerosol loading in this region could reduce solar radiation reaching the surface (Che et al., 2005; Qian et al., 2006, 2007), modify warm cloud properties (Jiang et al., 2013), and suppress light rainfall events (Qian et al., 2009).

The individual effects of urbanization-induced UHI and aerosol emission on local and regional climate have been examined separately in several modeling studies using short simulations of selected weather episodes at high spatial resolution or multiple-year climate simulations at coarse resolution. To more robustly quantify the urbanization-induced UHI and aerosol effects, convection-permitting simulations may reduce uncertainties in representing convection and its interactions with aerosols, which are parameterized in coarse-resolution models. Additionally, multi-year simulations are needed to understand and quantify the overall effects of land-cover change and aerosols in different large-scale environments (Oleson et al., 2008). In this study, a state-of-the-art regional model coupled with online chemistry (WRF-Chem) and a single-layer Urban Canopy Model (UCM) is used to simulate climate features in the YRD region. The climatic effects of the separate and combined land-cover and aerosol changes induced by urbanization are investigated using a set of 5-year (2006-2010) simulations with a horizontal resolution at convection-permitting scale (3 km). The paper is organized as follows. Section 2 describes the model configuration, experiment design, and model evaluation. The urbanization effects on extreme temperature and precipitation are presented in Section 3, followed by a summary of the conclusions in Section 4.

## 2. Method

### 2.1 Model configuration

The WRF-Chem model (Grell et al., 2005; Fast et al., 2006; Qian et al., 2010) simulates trace gases, aerosols and meteorological fields interactively (Skamarock et al., 2008; Wang et al., 2009), including aerosol-radiation interactions (Zhao et al., 2011, 2013a) and aerosol-cloud interactions (Gustafson et al., 2004). The coupled single-layer UCM (Kusaka et al., 2001; Chen et al., 2001) is a column model that uses a simplified geometry with two-dimensional, symmetrical street canyons to represent the momentum and energy exchanges between the urban surface and the atmosphere. The RADM2 (Regional Acid Deposition Model 2) gas chemical mechanism (Stockwell et al., 1990) and the MADE (Modal Aerosol Dynamics Model for Europe) and SORGAM (Secondary Organic Aerosol Model) aerosol module (Schell et al., 2001) are used. Detailed configuration of the above models can be found in Zhao et al. (2010). No cumulus parameterization is used at the convection-permitting resolution. The physical parameterization schemes used in our simulations are listed in Table 1.

### 2.2 Numerical experiments

Simulations are performed over a model domain centered at (120.50 °E, 31.00 °N) with a horizontal grid spacing of 3 km and 50 vertical levels extending from the surface to 50 hPa. The lowest 10 model layers are placed below 1 km to ensure a fine vertical resolution within the planetary boundary layer. Initial and boundary conditions for meteorological fields are derived from the National Center for Environmental Prediction (NCEP) FNL global reanalysis data on  $1^\circ \times 1^\circ$  grids at 6-hour interval. Lateral boundary conditions for chemistry are provided by a quasi-

global WRF-Chem simulation (Zhao et al., 2013b) that includes aerosols transported from regions outside the model domain.

The dominant land cover within each model grid cell is derived from the U.S. Geological Survey (USGS) 30 second dataset that includes 24-category land-use type, except that the land use over urban areas is updated using the stable nighttime light product (version 4) at 1 km spatial resolution (available at the National Geophysical Data Center, <http://ngdc.noaa.gov/eog//dmsp/downloadV4composites.html>). Corresponding to the value of lighting index of 25-50, 50-58, and >58 in the above product, each urban grid is identified as “Low Intensity Residential (LIR)”, “High Intensity Residential (HIR)”, or “Commercial/Industrial/Transportation (CIT)”, respectively. Figures 1a and 1b illustrate the urban area within the model domain for year 1970 and 2006, respectively. The anthropogenic heating (AH), characterized by a diurnal cycle with two peaks at rush hours of 0800 and 1700 LST, respectively, is incorporated in the model simulations. The default maximum values of AH in WRF for LIR ( $20 \text{ W m}^{-2}$ ), HIR ( $50 \text{ W m}^{-2}$ ) and CIT ( $90 \text{ W m}^{-2}$ ) are used in this study (Tewari et al., 2007). Anthropogenic emissions of aerosols and their precursors are obtained from the Asian emission inventory (Zhang et al., 2009b), which is a  $0.5^\circ \times 0.5^\circ$  gridded dataset for 2006. Black carbon (BC), organic matter (OM), and sulfate emissions over China are extracted from the China emission inventory for 2008 (Lu et al., 2011), which provides monthly mean data on  $0.1^\circ \times 0.1^\circ$  grids. It should be noted that the Noah land surface model defines a dominant land cover type for each grid, so no subgrid variability is simulated.

The anthropogenic emission fluxes of  $\text{SO}_2$  and BC in the simulation domain are shown in Figures 1c and 1d, respectively. Areas with large emissions are mainly located in four city clusters, i.e., Nanjing-Zhenjiang-Yangzhou, Suzhou-Wuxi-Changzhou, Shanghai, and Hangzhou Bay, all



inside the mega-city belt. Biomass burning emissions for the simulation period are obtained from the monthly Global Fire Emissions Database Version 3 (GFEDv3), which provides monthly mean data on  $0.5^\circ \times 0.5^\circ$  grids and the vertical distribution is determined by the injection heights described by Dentener et al. (2006) for the Aerosol Inter-Comparison project (AeroCom). Sea salt and dust emissions are configured following the same approach of Zhao et al. (2013b).

In order to investigate the individual responses of local and regional climate to land-cover change and increased aerosol loading, three experiments (i.e., LU06E06, LU70E70, and LU70E06) are conducted for 5 years from 2006 to 2010. The configurations of land use and aerosol emissions for these experiments are summarized in Table 2. All three simulations are performed using the same initial and boundary conditions and physics schemes, but with different land use types and/or anthropogenic emissions. LU06E06 is the control experiment, which represents the “present” (2006) urbanization level for both land use and aerosol/precursor emissions. LU70E06 uses the present aerosol emission data but with the land use of the 1970s, which is derived from the USGS dataset without the nighttime light correction. In LU70E70, both land use and emissions are set to the conditions of the 1970s. The differences of LU06E06-LU70E06, LU70E06-LU70E70, and LU06E06-LU70E70 can be used to derive the urban land-use effect, aerosol effect, and their combined effect, respectively (Table 3). The simulations are initialized on December 15 of each year during 2005-2009 to allow for a 16-day spin-up time and then continuously integrated for the next year (from January 1 to December 31). Results from January 1 to December 31 of all five years (2006-2010) are analyzed.

## **2.3 Model evaluation**

The surface skin temperature simulated in LU06E06 is averaged over 2006-2010 and compared with the MODIS data. A spatial filtering method described by Wu and Yang (2012) is applied to isolate the heterogeneous climatic forcing of urbanization. More specifically, for each grid a spatial anomaly is defined as the departure from the average value over a region centered at each grid. Then, the moving spatial anomalies are calculated for all the grids with the moving region acting as a filtering window, which has a size of  $1^{\circ} \times 1^{\circ}$ . Figure 2 shows the moving spatial anomalies of mean surface skin temperature from MODIS observations and the L06E06 simulation. The simulation captures the spatial distribution of observed surface skin temperature very well. In particular, the warmer centers over highly urbanized areas are well reproduced, despite slight underestimations in some mega cities in Zhejiang Province such as Hangzhou and Ningbo. Shanghai and Su-Xi-Chang exhibit the highest temperatures that are  $2^{\circ}\text{C}$  above the surrounding rural areas.

To further validate the model, the baseline simulation LU06E06 is evaluated against meteorological station observations for 2006-2010. Figure 3 shows the averaged near-surface temperature and precipitation from observations and LU06E06. The simulated spatial pattern of near-surface air temperature agrees well with observations, with high temperature centers located at meteorological stations in major cities such as Shanghai and Hangzhou. The simulated temperature displays substantial spatial variability associated with heterogeneity in topography, land cover, and other regional forcings. The model captures the general north-to-south gradient of increasing precipitation in the observations. However, the model overestimates precipitation in Shanghai and central Jiangsu Province but underestimates the precipitation in the southwestern part of the domain.

## **3. Results**

### **3.1 Urbanization impact on surface temperature, radiation flux and heat waves**

#### **3.1.1 Mean near-surface air temperature**

Figure 4 shows the differences in 2-meter near surface air temperature (T2m) among the three experiments to quantify the UHI and aerosol effects from urbanization (Table 3). The UHI effect causes an increase in near-surface temperature over the urbanized area in summer. The average temperature increase is about 0.53 °C over urban area and 1.49 °C in commercial areas outlined by the green contours (see Fig. 4a). In winter, the UHI warming effect occurs primarily in commercial areas, where the mean temperature increases by about 0.7 °C. In areas surrounding the central commercial region, however, temperature decreases due to the urban land-cover change (shown in Fig. 4d). Such a cooling effect in winter has also been found in previous studies (e. g., Oke, 1982; Jauregui et al., 1992; Wang et al., 2007). The “cool island” effects of urbanization during daytime in winter can be explained by the much larger surface thermal inertia of urban areas than that of rural areas with very low vegetation cover during winter (Wang et al., 2007). Although the wintertime cooling effect in urbanized area is not widely recognized, it is an important phenomenon that is also simulated by the model.

The increased aerosols induced by urbanization exert a cooling effect over the entire simulation domain in both summer and winter (Fig. 4b and 4e). On a domain average, the temperature reduction induced by increased aerosols is less than the warming induced by the UHI effect in both seasons. Therefore, the net urbanization impact (including both land-cover change and aerosol increase) on near-surface temperature is dominated by the UHI warming effect (Fig. 4c and 4f) resulted from the land-cover change in the YRD.

### 3.1.2 Surface solar radiation

The effects of urban land-cover change and increased aerosols on surface net shortwave radiation are shown in Fig. 5. As the building clusters reduce surface albedo (Oke, 1987), land-cover change increases the net shortwave radiation over urbanized areas, with an average increase of  $9.11 \text{ W m}^{-2}$  in summer and  $8.49 \text{ W m}^{-2}$  in winter. The net increase is greater in summer than in winter because of the stronger summertime incoming solar radiation. On the contrary, aerosols reduce the surface net shortwave radiation in the northern part of the domain corresponding to the larger  $\text{SO}_2$  and BC emission rates (Fig. 1), with a magnitude of  $8.79 \text{ W m}^{-2}$  in summer and  $7.63 \text{ W m}^{-2}$  in winter. Different from the UHI effect that is more localized, the radiative impact of aerosols is more widespread and significant west of the major urban areas and even over the ocean. Figure 6 shows the spatial pattern of mean surface winds simulated in LU70E70 and the difference in column-integrated  $\text{PM}_{2.5}$  mass concentration between LU70E06 and LU70E70. Consistent with the prevailing monsoon circulation, southeasterly (northeasterly) flows dominate the YRD in summer (winter), which lead to increases in the  $\text{PM}_{2.5}$  concentration over the downwind area of the YRD city clusters. The increased  $\text{PM}_{2.5}$  concentrations downwind of the YRD reduce solar radiation to the west (southwest) of the YRD in summer (winter), as shown in Figs. 5b and 5d. Hence aerosol effects on radiation are not limited to the emission source areas in metropolitan regions.

### 3.1.3 Heat waves

The UHI effect can significantly increase the near-surface temperatures in summer, thereby exacerbating extreme heat waves in urbanized areas (Stone, 2012). By definition, a heat wave occurs when the near-surface temperature reaches or exceeds  $35^\circ\text{C}$  for three or more consecutive

days (Tan et al., 2004). The averaged heat wave days comparing LU06E06 and LU70E06 increase at a rate of 3.7 d/yr in the major mega cities (Fig. 7a). The increase is most pronounced in Shanghai, with a rate larger than 12 d/yr.

High temperature during heat wave contributes to heat exhaustion or heat stroke, but the impact of atmospheric humidity on evaporation is also crucial. Here we use a heat stress index to assess the combined effects of temperature and humidity on human health due to the UHI effect, expressed as (Masterson and Richardson, 1979):

$$Humidex = Ta + (5/9)(e - 10) \quad (1)$$

where  $Ta$  is near-surface air temperature ( $^{\circ}\text{C}$ ) and  $e$  is water vapor pressure (hPa). Figure 7b depicts a big increase in heat stress index (Humidex) over urbanized regions in the YRD, except for the city of Hangzhou. The increase in heat stress index is more accentuated in Shanghai, with a mean increase of 2.16, relative to other urban areas. This suggests that humidity has a larger influence on heat stress in Shanghai because of its proximity to the ocean compared to urban areas further inland. In contrast, increased aerosols have little impact on heat waves (results not shown) because their impacts on near-surface temperature are much weaker (Fig. 4b).

## **3.2 Urbanization effects on summertime precipitation**

### **3.2.1 Long-term impact on extreme rainfall**

Previous studies have provided evidence of urbanization effect on precipitation distribution in and around urban areas (e.g. Shepherd et al., 2003; Kaufmann et al., 2007; Miao et al., 2010). Several mechanisms have been proposed for the effects of urbanization on precipitation: (1) the UHI effect can destabilize the planetary boundary layer (PBL) and trigger convection; (2)

increased surface roughness may enhance atmospheric convergence that favors updrafts; (3) building obstruction tends to bifurcate rainfall systems and delays its propagation; (4) the change in land-cover decreases local evaporation, (5) anthropogenic emissions increase aerosol loading in the atmosphere, with subsequent effects on precipitation through changes in radiation and cloud processes. These mechanisms contribute to positive and negative changes in precipitation, leading to more complicated effects on precipitation than temperature.

In this section we analyze the results of the three 5-year simulations to examine the long-term impact of urbanization on precipitation. The results show that influences of both urban land cover and elevated aerosols on annual and seasonal mean precipitation are relatively small (not shown). This may be due to the urbanization effect for different rainfall events offsetting each other, leading to an overall weak effect on a longer time scale (see Section 3.2.2). Here we focus on the frequency of extreme rainfall over the YRD region. Extreme summer rainfall events are defined using hourly precipitation rate that is above 95<sup>th</sup> percentile at each grid for the period of 2006-2010. Figure 8 shows the diurnal cycles of extreme rainfall frequency and urbanization-induced changes in the areas around Nanjing, Shanghai, and Su-Xi-Chang (shown in Fig. 1b). The frequency of hourly extreme rainfall reaches its maximum at around 16:00-17:00 LST over three urban clusters. Urban land-cover change increases the occurrence of extreme precipitation in the afternoon (12:00 to 20:00 LST). The maximum increase in the frequency of extreme hourly rainfall events for Nanjing, Shanghai, and Su-Xi-Chang can reach 0.86%, 1.09%, and 0.79%, respectively, with the peak increase occurring in the late afternoon. On the contrary, aerosols exert an opposite impact to substantially reduce the frequency of extreme rainfall in the afternoon by up to 1.05%, 0.75%, and 0.72% for Nanjing, Shanghai, and Su-Xi-Chang, respectively. These impacts are significant compared to the maximum frequency of hourly extreme rainfall of about 10% in each

area. However, opposite effects of land-cover and aerosol emission changes result in a small net urbanization effect on extreme precipitation.

Because urbanization influences extreme precipitation primarily in the afternoon, we further analyze extreme rainfall events with a focus on the averages from 1200 to 2000 LST. Figure 9 shows the substantial increase in extreme precipitation frequency concentrated over the major metropolitan areas in the YRD, with some compensation in the surrounding areas in general. Aerosols, however, reduce the occurrence of extreme precipitation more uniformly in most areas of the domain. The most significant influence of aerosols is found in the northwest part of the domain where aerosol concentrations increase the most downwind of the urban centers (Fig. 6a). Similar to the effects on surface temperature and solar radiation (Figs. 4 and 5), aerosols have a substantial impact on the occurrence of extreme precipitation over a wider area than the effects of urban land-use change.

How do changes in land cover and aerosols modulate extreme rainfall frequency? Figure 10a shows the diurnal time-height cross section of the impact of urban land-cover (i.e., the difference between LU06E06 and LU70E06) on temperature and divergence averaged over the three city clusters (Nanjing, Shanghai, and Su-Xi-Chang). Air temperature over the urbanized areas increases significantly in the afternoon (from 1200 to 1800 LST) due to the UHI effect. The warming and the increased roughness length in urban areas favor convergence in the lower atmosphere and divergence above. As a result, the mean updraft increases over the urbanized areas in the afternoon (Fig. 10b), which increases cloud water from the lower to middle troposphere in the afternoon. Shortly before noon, there is a small reduction in low clouds, which may be related to the reduced relative humidity due to warmer temperature and/or reduced evaporation from the urban land cover, the so-called urban dry island effect (e.g., Hage, 1975; Wang and Gong, 2009). The increase

in cloud water in the afternoon is consistent with the enhanced updrafts. This mechanism potentially explains the increased frequency of extreme precipitation in urban areas in the afternoon (e.g. Craig and Bornstein, 2002; Rozoff et al., 2003; Wan et al., 2013; Zhong and Yang, 2015a, 2015b).

To understand the aerosol-induced reduction in extreme rainfall events, we analyze the diurnal cycle of aerosol effect (i.e., the difference LU70E06 and LU70E70) on radiative heating, vertical velocity, and net solar radiation at the surface (Fig. 11). As BC emission rates are relatively high in the YRD region (Fig. 2d), aerosols heat the atmosphere due to absorption of solar radiation during daytime (from 08:00 to 17:00 LST). As a result of absorption and scattering of solar radiation by aerosols, less solar radiation reaches the surface. These changes at the surface and in the atmosphere stabilize the atmosphere and reduce convective intensity in the afternoon (from 14:00 to 20:00 LST), which reduces the frequency of extreme rainfall events (Koren et al., 2004; Qian et al., 2006; Zhao et al., 2006; 2011; Fan et al., 2007). Although aerosols can enhance precipitation through cloud microphysical changes that invigorate convection (e.g., Khain et al., 2009; Rosenfeld et al., 2008; Fan et al., 2013), aerosol radiative effects generally dominate in China because of the high AOD and strong light-absorbing aerosol properties (Yang et al., 2011; Fan et al., 2015).

### **3.2.2 Synoptic influence on urbanization impacts**

The impacts of urbanization-induced UHI and aerosols on precipitation may be highly variable under different synoptic conditions that influence the atmospheric circulation and cloud and boundary layer processes. Precipitation changes due to urbanization effects may offset each other under different synoptic conditions, leading to an overall weak effect on mean precipitation



at longer time scales as discussed in section 3.2.1. We select two typical heavy late-afternoon  
 rainfall events with different background circulations over the YRD region. Case A occurred from  
 08:00 LST 23 June to 08:00 LST 24 June 2006 and case B occurred from 08:00 LST 1 July to  
 08:00 LST 2 July 2006. Figure 12a and 12d show the mean precipitation rate and 850 hPa winds  
 for case A and case B, respectively. Southwesterly flow dominates the entire region in case A (Fig.  
 12a), while in case B (Fig. 12d) southwesterly and northwesterly winds dominate the southern and  
 northern parts of precipitation area, respectively. The averaged background wind speed in case B  
 is much stronger than that in case A, representing stronger synoptic forcing in case B. The effects  
 of urban land-cover change and aerosols on precipitation for the case A (case B) are illustrated in  
 Figs. 12b and 12c (Figs. 12e and 12f), respectively. Both cases show significant precipitation  
 responses to the forcing of urban land-cover and aerosols. We can see that urban land cover  
 increases the rainfall intensity in case A but aerosols decrease precipitation over the urbanized area  
 (Figs. 12b and 12c). The precipitation response to urban land cover and aerosols is just the opposite  
 in case B (Figs. 12e and 12f). Figs. 13a and 13d illustrate the evolution of precipitation in region  
 R1 (Fig. 12a) and R2 (Fig. 12d), respectively, for the two cases. In both cases, rainfall mainly  
 occurred between 08:00 LST and 20:00 LST. The corresponding impacts of urban land-cover and  
 aerosols are shown in Figs. 13b-c and Figs. 13e-f for cases A and B, respectively. In case A, the  
 urban land-cover substantially increases the precipitation intensity in the afternoon with a  
 maximum increase of  $6.87 \text{ mm h}^{-1}$ . Aerosol effects, on the contrary, decrease the rainfall intensity  
 with a maximum reduction of  $3.85 \text{ mm h}^{-1}$ . In case B, however, effects of urban land-cover and  
 enhanced aerosols on precipitation are opposite to that in case A. A maximum rainfall reduction of  
 $3.81 \text{ mm h}^{-1}$  is found to be associated with the effect of urban land cover and an increase of  $2.85$   
 $\text{mm h}^{-1}$  is associated with the aerosol forcing.

Why do urban land-cover and aerosols exert opposite effects on precipitation during the two rainfall events? Here we attempt to answer this question by examining the dynamical and thermodynamical changes induced by the UHI and aerosols using the moisture flux convergence (MFC), which is defined as:

$$\text{MFC} = -\nabla \cdot (q\vec{V}_h) = -q\nabla \cdot \vec{V}_h - \vec{V}_h \cdot \nabla q \quad (2)$$

The first and second terms on the right hand side of Eq. 2 denote wind convergence (CON) and moisture advection (MA), respectively.

Figures 14a and 14b illustrate the time-height cross sections of changes in moisture flux convergence and cloud water mixing ratio induced by land-cover and aerosol changes over the region R1 (Fig. 12a) during the rainy period in case A. Urban land-cover enhances the convergence of moisture fluxes in the lower troposphere, which results in increased precipitation (Fig. 14a). On the contrary, aerosols weaken the convergence of moisture fluxes and thus reduce precipitation (Fig. 14b). These changes are consistent with those associated with extreme rainfall changes shown in Fig. 10. Interestingly for case B over R2, urban land-cover weakens the convergence of moisture fluxes (Fig. 14c) and thus suppresses precipitation (Fig. 13e) from 08:00 LST 1 July to 02:00 LST 2 July 2006. Aerosols, however, enhance the convergence of moisture fluxes over R2 (Fig. 14d) and thus increase precipitation (Fig. 13f). These results establish obvious correspondence between moisture flux convergence changes and the precipitation response to urban land cover and aerosols in the two rainfall events and suggest different processes may dominate the moisture flux convergence changes for the two cases.

Figure 15 presents the time-height cross section of the changes in the two terms of MFC, i.e., CON (convergence) and MA (moisture advection), induced by land-cover and aerosol changes

averaged over R1 (Fig. 12a) for case A and over R2 (Fig. 12d) for case B. Urban land-cover enhances the wind convergence over R1 in case A (Fig. 15a), leading to an increase in CON by up to  $1.56 \times 10^{-4} \text{ g kg}^{-1} \text{ s}^{-1}$ , which is much larger than the increase of  $0.61 \times 10^{-4} \text{ g kg}^{-1} \text{ s}^{-1}$  averaged over R2 (Fig. 15c) in case B. The larger enhancement of convergence in case A is attributed to the strong UHI-induced surface heating during this rainfall period (figure not shown). In contrast, aerosols reduce the convergence in both case A and case B due to the aerosol cooling effect near the surface, as discussed previously (Fig. 11). The reduction of convergence in case A is more significant than that in case B because of the larger aerosol loading and, therefore, stronger surface cooling over R1 in case A (not shown). Urban land-cover reduces moisture advection in both cases, with a maximum decrease of  $-0.99$  and  $-1.89 \times 10^{-4} \text{ g kg}^{-1} \text{ s}^{-1}$ , respectively. Aerosols, however, increase moisture advection, and the maximum increases are  $0.93$  and  $1.31 \times 10^{-4} \text{ g kg}^{-1} \text{ s}^{-1}$  in case A and case B, respectively. Our results show clearly that the changes in CON are opposite to that in MA. As the impacts of urban land-cover and aerosols on moisture advection are greater in case B than in case A, the net changes in the moisture flux convergence are dominated by MA in case B and by CON in case A, leading to opposite effects between the two cases.

The significant differences in the responses of MA between the two cases are related to different background circulations during the two events (Figs. 12a and 12d). Weaker southwesterly flow dominates the entire region in case A (Fig. 12a), while in case B (Fig. 12d) stronger southwesterly and northwesterly winds dominate the southern and northern parts of precipitation area, respectively. The changes in MA could be further decomposed into three terms, as shown below in Eq. 3:

$$-\Delta \mathbf{V} \cdot \nabla \mathbf{q} = -\mathbf{V}_{\text{ctrl}} \cdot \Delta(\nabla \mathbf{q}) - (\nabla \mathbf{q})_{\text{ctrl}} \cdot \Delta \mathbf{V} - \Delta(\nabla \mathbf{q}) \cdot \Delta \mathbf{V} \quad (3)$$

The first term on the right-hand side of is associated with the change in water vapor, while the second term is associated with the change in circulation. The third term is a nonlinear term including the contribution of both the moisture and circulation changes. Figure 16 illustrates the changes in the first and second term, respectively. The contribution of the third nonlinear term is small and negligible compared to the other two terms (not shown). Urban land-cover reduces the first term in both cases, with a maximum decrease of  $-0.34$  and  $-1.54 \times 10^{-4} \text{ g kg}^{-1} \text{ s}^{-1}$ , respectively. Aerosols, however, increase the first term, and the maximum increases are  $0.49$  and  $1.78 \times 10^{-4} \text{ g kg}^{-1} \text{ s}^{-1}$  in case A and case B, respectively. The urban land-cover and aerosol effects on the second term are quite similar for both cases. Therefore, the most significant difference between these two cases is the change in the first term, which is directly associated with the background circulation. These changes in the first term are much larger in case B because of the stronger background winds than in case A, contributing to a more significant modification in MA as shown in Figure 15.

In summary, case B represents stronger synoptic forcing than case A. The stronger winds and larger spatial coverage of clouds and precipitation associated with the larger scale synoptic system weakens the UHI and aerosol effects through ventilation and changes in radiation, resulting in weaker CON and larger MA changes. Conversely, with weaker synoptic forcing, the stronger UHI and aerosol effects enhance the changes in CON while MA effects are smaller due to the weaker background winds. Therefore, our results highlight the distinguishing role of synoptic forcing on how urban land-cover and aerosol influence the dynamical and thermo-dynamical environments and precipitation.

## 4. Summary

In this study, the state-of-the-art WRF-Chem model coupled with a single-layer UCM, is run at convection-permitting scale to investigate the influences of urbanization-induced land-cover change and elevated aerosol concentrations on local and regional climate in the Yangtze River Delta (YRD) in China. A 5-year period (2006-2010) is selected for multi-year simulations to investigate urbanization effects on extreme events and the role of synoptic forcing. Three experiments were conducted with different configurations of land cover and aerosol emissions: (1) urban land and emissions in 2006, (2) urban land in the 1970s and emissions in 2006, and (3) urban land and emissions in the 1970s. The experiment with the 2006 land-use type and anthropogenic emissions reproduces the observed spatial patterns of near-surface air temperature and precipitation fairly well.

The expanded urban land cover and increased aerosols have opposite impacts on the near-surface air temperature. The urban land-use change increases 2-m air temperature due to the UHI effect in commercial areas with a domain-averaged increase of 1.49 °C in summer and 0.7 °C in winter. In the surrounding areas, however, surface air temperature increases in summer but decreases in winter. The latter is attributed to the much greater thermal inertia over urban areas than over rural areas in wintertime when both vegetation cover and soil moisture are at their seasonal minimum. Compared to the effect of land-cover change, aerosol effect exerts a less significant influence on near-surface temperature with minor decreases in both summer and winter. Overall, the impact of urban land-use change outweighs that of enhanced aerosols on regional temperature especially in summer. The increase in near-surface temperature induced by the UHI effect leads to an increase in heat wave days by 3.7 days per year over the major mega cities in the YRD region. The greater response of solar radiation to urban land-cover in summer is the major factor contributing to the larger changes in surface temperature in summer than in winter.

Compared to the urban land-use effect, aerosol effect on reducing the surface solar radiation occurs over a much broader region including the downwind area of the city clusters.

The urban land-cover change and increased aerosols have opposite effects on the frequency of extreme rainfall during summer. The UHI effect leads to more frequent extreme precipitation over the urbanized area in the afternoon because of an enhanced near-surface convergence and vertical motion. In contrast, aerosol tends to decrease the frequency of extreme precipitation because of its cooling effect near the surface and heating effect (by light-absorbing particles) above, leading to an increased atmospheric stability and weakened updrafts. Additional aerosols can also induce decreases in the frequency of extreme precipitation over non-urban areas, particularly in the downwind area of the city clusters.

The effects of both urban land-cover and increased aerosols on summertime rainfall vary with synoptic weather systems and environmental conditions. Two late-afternoon rainfall events are selected for in-depth analysis. For the two cases, urbanization exerts similar impacts on local-scale convergence and mean wind speed, which modify the strength of moisture transport. More specifically, the effect of urban land-cover increases local-scale convergence due to the UHI-induced circulation and reduces low-level wind speed, while aerosols have an opposite effect due to the cooling near the surface. We found that the impacts of urban land-cover and aerosol on precipitation are determined not only by their effect on local-scale convergence, but also modulated by the large-scale weather systems. Our analyses suggest that synoptic forcing plays a significant role in how urbanization-induced land-cover and aerosols influence individual rainfall event. Although the two rainfall events selected for the analysis do not represent all types of precipitation events in the YRD Region, they demonstrate how the effect of urbanization on precipitation may vary and offset each other under different synoptic conditions, leading to an

overall weak effect on mean precipitation at longer time scales. To further quantify urbanization effects, uncertainties in anthropogenic emissions and heating, unresolved urban building and streets structure, and representation in aerosol-cloud interactions and cloud microphysics in the model should be investigated in future studies. Further investigation is also needed to have a better and more comprehensive understanding of the complicated mechanisms through which urbanization influences heavy rainfall under a full range of weather conditions.

## **Acknowledgments**

The contributions of PNNL authors are supported by the U.S. Department of Energy's Office of Science as part of the Regional and Global Climate Modeling Program and Atmospheric System Research (ASR) program. The contribution of Shi Zhong and Xiu-Qun Yang is supported by the National Basic Research Program of China (2010CB428504), Jiangsu Collaborative Innovation Center for Climate Change, and the Scholarship Award for Excellent Doctoral Student granted by China Scholarship Council. The work of Ben Yang is supported by the National Natural Science Foundation of China (41305084). Computations were performed using resources of the National Energy Research Scientific Computing Center (NERSC) at Lawrence Berkeley National Laboratory and PNNL Institutional Computing. The Pacific Northwest National Laboratory is operated for DOE by Battelle Memorial Institute under contract DE-AC05-76RL01830. All model results are archived on a PNNL cluster and available upon request. Please contact Yun Qian (yun.qian@pnnl.gov).

501

502

503

504



## Reference

- Baik, J. J., Kim, Y. H., Kim, J. J., and Han, J. Y.: Effect of boundary-layer stability on urban heat island induced circulation, *Theor. Appl. Climatol.*, 89, 73–81, 2007.
- Bauer, S. E., and Menon, S.: Aerosol direct, indirect, semidirect, and surface albedo effects from sector contributions based on the IPCC AR5 emissions for preindustrial and present-day conditions, *J. Geophys. Res.*, 117, D01206, doi: 10.1029/2011JD016816, 2012.
- Bornstein, R., and Lin, Q.: Urban heat islands and summertime convective thunderstorms in Atlanta: Three cases studies, *Atmos. Environ.*, 34, 507–516, 2000.
- Braham, R. R.: Comments on “Urban, topographic and diurnal effects on rainfall in the St. Louis region”. *J. Appl. Meteorol.*, 18, 371-374, 1979.
- Changnon, S. R.: Rainfall changes in summer caused by St. Louis, *Science*, 205, 402–404, 1979.
- Charlson, R. J., et al.: Climate forcing by anthropogenic aerosols, *Science*, 255, 423–430, 1992.
- Che, H. Z., Shi, G. Y., Zhang, X. Y., Arimoto, R., Zhao, J. Q., Xu, L., Wang, B., and Chen, Z. H.: Analysis of 40 years of solar radiation data from China, 1961–2000, *Geophys. Res. Lett.*, 32, L06803, doi:10.1029/2004GL022322, 2005.
- Chen, F., Kusaka, H., Bornstein, R., et al.: The integrated WRF/urban modeling system: development, evaluation, and applications to urban environmental problems, *Int. J. Climatol.*, 31(2), 273-288, 2001.
- Coakley, J. A., Bernstein, R. L., and Durkee, P. A.: Effect of ship-track effluents on cloud reflectivity, *Science*, 273, 1020–1022, 1987.

525 Craig, K., and Bornstein, R.: MM5 simulation of urban induced convective precipitation over  
 526 Atlanta. Preprints, Fourth Conf. on the Urban Environment, Norfolk, VA, Amer. Meteor.  
 527 Soc., 5–6, 2002.

528 Dentener, F., et al.: Emissions of primary aerosol and precursor gases in the years 2000 and 1750  
 529 prescribed data-sets for AeroCom, Atmos. Chem. Phys., 6, 4321–4344, doi:10.5194/acp-6-  
 530 4321-2006, 2006.

531 Du, Y., et al.: Impact of urban expansion on regional temperature change in the Yangtze River  
 532 Delta, J. of Geophys. Sci., 17(4): 387-398, 2006.

533 Fast, J. D, et al.: Evolution of ozone, particulates, and aerosol direct forcing in an urban area using  
 534 a new fully-coupled meteorology, chemistry, and aerosol model, J. Geophys. Res., 111,  
 535 D21305, doi:10.1029/2005JD006721, 2006.

536 Fan, J., Leung, L. R., Rosenfeld, D., Chen, Q., Li, Z., Zhang, J., and Yan, H.: Microphysical Effects  
 537 Determine Macrophysical Response for Aerosol Impacts on Deep Convective Clouds,  
 538 Proceedings of the National Academy of Sciences of the United States of America, 110(48),  
 539 E4581-E4590, doi:10.1073/pnas.1316830110, 2013.

540 Fan, J., Rosenfeld, D., Yang, Y., Zhao, C., Leung, Y. R., and Li, Z.: Substantial Contribution of  
 541 Anthropogenic Air Pollution to Catastrophic Floods in Southwest China, Geophys. Res. Lett.,  
 542 42(14), 6066-6075, doi:10.1002/2015GL064479, 2015.

543 Fan, J., Zhang, R., Li, G., Tao, W., and Li, X.: Simulations of cumulus clouds using a spectral  
 544 microphysics cloud resolving model, J. Geophys. Res., 112, D04201,  
 545 doi:10.1175/2010JAS3651.1, 2007.

546 Feingold G., Koren, I., Wang, H., Xue, H., and Brewer W.: Precipitation-generated oscillations in  
547 open cellular cloud fields. *Nature*, 466, 849–852, 2010.

548 Grell, G. A., Peckham, S. E., Schmitz, R., et al.: Fully coupled “online” chemistry within the WRF  
549 model, *Atmos. Environ.*, 39, 6957–6975, 2005.

550 Gustafson, W. I., Chapman, E. G., Ghan, S. J., Easter, R. C., and Fast, J. D.: Impact on modeled  
551 cloud characteristics due to simplified treatment of uniform cloud condensation nuclei during  
552 NEAQS 2004, *Geophys. Res. Lett.*, 34, L19809 doi:10.1029/2007GL0300321, 2007.

553 Guo, X., Fu, D., and Wang, J.: Mesoscale convective precipitation system modified by  
554 urbanization in Beijing city, *Atmos. Res.*, 82, 112–126, 2006.

555 Hage, K. D.: Urban-rural humidity difference, *J. Appl. Meteor.*, 14(7), 1277-1283, 1975.

556 Hansen, J., Sato, M., and Ruedy, R.: Radiative Forcing and Climate Response, *J. Geophys. Res.*,  
557 102, 6831–6864, 1997.

558 Hjermfelt, M. R.: Numerical simulation of the effects of St. Louis on mesoscale boundary layer  
559 airflow and vertical motion: Simulations of urban vs. non-urban effects, *J. Appl. Meteor.*, 21,  
560 1239–1257, 1982.

561 Hu, Y., Ban, Y., Zhang, Q., and Liu, J.: The trajectory of urbanization process in the Yangtze River  
562 Delta during 1990 to 2005. 7th Urban Remote Sensing Joint Event, 20–22 May 2009,  
563 Shanghai, DOI: 10.1109/URS.2009.5137536, 2009.

564 Huff, F. A., and Changnon Jr., S. A.: Climatological assessment of urban effects on precipitation  
565 at St. Louis, *J. Appl. Meteorol.*, 11, 823-842, 1972.

566 Inoue, T., and Kimura, F.: Urban effects on low-level clouds around the Tokyo metropolitan area  
 567 on clear summer days, *Geophys. Res. Lett.*, 31, L05103, doi:10.1029/2003GL018908, 2004.

568 Jauregui, E., Godinez, L., and Cruz, F.: Aspects of Heat-Island Development in Guadalajara,  
 569 Mexico, *Atmos. Environ.* 26B, 391–396, 1992.

570 Jiang Y, Liu, X., Yang, X. Q.: A numerical study of the effect of different aerosol types on East  
 571 Asian summer clouds and precipitation, *Atmos. Environ.*, 70, 51-63, 2013.

572 Kaufmann, R. K., Seto, K. C., Schneider, A., Liu, Z., Zhou, L., Wang, W.: Climate response to  
 573 rapid urban growth: evidence of a human-induced precipitation deficit, *J. Climate*, 20(10),  
 574 2299-2306, 2007.

575 Khain A. P.: Notes on state-of-the-art investigations of aerosol effects on precipitation: a critical  
 576 review, *Environ. Res. Lett.*, 4(1), 015004, 2009.

577 Koren, I., et al.: Measurement of the effect of Amazon smoke on inhibition of cloud formation,  
 578 *Science*, 303(5662), 1342-1345, 2004.

579 Kusaka, H., Kikegawa, Y., and Kimura, F.: A simple single layer urban canopy model for  
 580 atmospheric models: comparison with multi-layer and slab models, *Bound-Layer Meteor.*,  
 581 101, 329–358, 2001.

582 Landsberg, H. E.: *The Urban Climate*, Academic Press, London, UK, 1981.

583 Lei, M., et al.: Effect of explicit urban land surface representation on the simulation of the 26 July  
 584 2005 heavy rain event over Mumbai, India, *Atmos. Chem. Phys.*, 8 (20), 5975-5995, 2008.

585 Lu, Z., Zhang, Q., and Streets, D. G.: Sulfur dioxide and primary carbonaceous aerosol emissions  
 586 in China and India, 1996–2010, *Atmos. Chem. Phys.*, 11(18), 9839–9864, 2011.

587 Masterson, J., Richardson F. A.: Humidex. A method of quantifying human discomfort due to  
 588 excessive heat and humidity, Environment Canada, Downsview, 1979.

589 McFarquhar, G. M., and H. Wang: Effects of aerosols on trade wind cumuli over the Indian Ocean:  
 590 Model simulations, *Q. J. R. Meteorol. Soc.*, 132, 821–843, 2006.

591 Miao, S. G., Chen, F., Li, Q. C., and Fan, S. Y.: Impacts of urban processes and urbanization on  
 592 summer precipitation: a case study of heavy rainfall in Beijing on 1 August 2006, *J. Appl.*  
 593 *Meteorol. Climatol.*, 50, 806–825, 2010.

594 Monin, A. S., and Obukhov, A. M.: Basic laws of turbulent mixing in the surface layer of the  
 595 atmosphere, *Contributions of the Geophysical Institute of the Slovak Academy of Sciences*,  
 596 24, 151, 163–187, 1954.

597 Oke, T. R.: The Energetic Basis of the Urban Heat Island, *Q. J. R. Met. Soc.*, 108, 1–22, 1982.

598 Oke, T. R.: *Boundary Layer Climates*. 2d ed. Methuen Co., 435 pp, 1987.

599 Oleson, K. W., Bonan, G. B., Feddema, J., and Vertensten, M.: An urban parameterization for a  
 600 global climate model. Part II: Sensitivity to input parameters and the simulated urban heat  
 601 island in offline simulations, *J. Appl. Meteor. Climatol.*, 47, 1061–1076, 2008.

602 Qian, Y., Kaiser, D. P., Leung, L. R., and Xu, M.: More frequent cloud-free sky and less surface  
 603 solar radiation in China from 1955 to 2000, *Geophys. Res. Lett.*, 33, L01812,  
 604 doi:10.1029/2005GL024586, 2006.

605 Qian, Y., Wang, W., Leung, L. R., and Kaiser, D. P.: Variability of solar radiation under cloud-free  
606 skies in China: The role of aerosols, *Geophys. Res. Lett.*, 34, L12804,  
607 doi:10.1029/2006GL028800, 2007.

608 Qian, Y., Gong, D., Fan, J., Leung, L. R., Bennartz, R., Chen, D., Wang, W.: Heavy pollution  
609 suppresses light rain in China: Observations and modeling, *J. Geophys. Res.*, 114, D00K02,  
610 doi:10.1029/2008JD011575, 2009.

611 Qian, Y., Gustafson Jr, W. I., and Fast, J. D.: An investigation of the sub-grid variability of trace  
612 gases and aerosols for global climate modeling, *Atmos. Chem. Phys.*, 10, 6917-6946,  
613 doi:10.5194/acp-10-6917-2010, 2010.

614 Qian, Y., Teppe, J., Yasunari, J., et al.: Light-absorbing particles in snow and ice: Measurement  
615 and modeling of climatic and hydrological impact. *Adv. Atmos. Sci.*, 32(1), 64–91, doi:  
616 10.1007/s00376-014-0010-0, 2015.

617 Ren, G., Zhou, Y., Chu, Z., Zhou, J., Zhang, A., Guo, J., Liu, X.: Urbanization Effects on Observed  
618 Surface Air Temperature Trends in North China, *J. Climate*, 21 (6), 1333-1348, 2008.

619 Rosenfeld, D.: Suppression of rain and snow by urban and industrial air pollution, *Science*, 287  
620 (5459), 1793-1796, 2000.

621 Rosenfeld, D., et al.: Flood or drought: How do aerosols affect precipitation? *Science*, 321, 1309–  
622 1313, doi:10.1126/science.1160606, 2008.

623 Rozoff, C., Cotton, W. R., and Adegoke, J. O.: Simulation of St. Louis, Missouri, land use impacts  
624 on thunderstorms, *J. Appl. Meteor.*, 42, 716–738, 2003.

625 Schell, B., Ackermann, I. J., Hass, H., Binkowski, F. S., and Ebel, A.: Modeling the formation of  
 626 secondary organic aerosol within a comprehensive air quality modeling system, *J. Geophys.*  
 627 *Res.*, 106, 28275–28293, 2001.

628 Sen Roy, S., and Yuan, F.: Trends in extreme temperatures in relation to urbanization in the Twin  
 629 Cities Metropolitan Area, Minnesota. *J. Appl. Meteor.*, 48 (3), 669-679, 2009.

630 Shepherd, J. M., and Burian, S. J.: Detection of urban-induced rainfall anomalies in a major coastal  
 631 city, *Earth Interactions*, 7(4), 1-17, 2003.

632 Shepherd, J. M., Carter, M., Manyin, M., Messen, D., and Burian, S.: The impact of urbanization  
 633 on current and future coastal precipitation: a case study for Houston, *Environ. Plan.*, 37, 284-  
 634 304, 2010.

635 Shepherd, J. M.: A review of current investigations of urban-induced rainfall and recommendations  
 636 for the future, *Earth Interact.*, 9 (12), 1-27, 2005.

637 Skamarock, W. C., Klemp, J. B.: A time-split nonhydrostatic atmospheric model for weather  
 638 research and forecasting applications, *J. Computational Physics*, 227(7): 3465-3485, 2008.

639 Stone, B.: *The city and the coming climate: Climate change in the places we live*, Cambridge  
 640 University Press, New York, 2012.

641 Stockwell, W. R., Middleton, P., Chang, J. S., and Tang, X.: The second generation regional acid  
 642 deposition model chemicalmechanism for regional air quality modeling, *J. Geophys. Res.*,  
 643 95, 16343–16367, 1990.

644 Storer R. L., and Van den Heever, S. C.: Microphysical processes evident in aerosol forcing of  
 645 tropical deep convective clouds, *J. Atmos. Sci.*, 70(2), 430-446, 2013.

646 Tan J., Kalkstein, L. S., Huang, J., Lin, S., Yin, H., Shao, D.: An operational heat/health warning  
647 system in Shanghai, *International Journal of Biometeorology*, 48(3), 157-162, 2004.

648 Tao, W. K., Chen, J. P., Li, Z., Wang, C., Zhang, C.: Impact of aerosols on convective clouds and  
649 precipitation, *Rev. Geophys.*, 50 (2), 2012.

650 Tewari, M., Chen, F., Kusaka, H., and Miao, S.: Coupled WRF/Unified Noah/urban-canopy  
651 modeling system, NCAR WRF Documentation. Boulder: NCAR, 1-20, 2007.

652 Wan, H. C., Zhong, Z., Yang, X. Q., and Li, X. Q.: Impact of city belt in Yangtze River Delta in  
653 China on a precipitation process in summer: A case study, *Atmos. Res.*, 125-126, 63–75, 2013.

654 Wang, H., and Feingold, G.: Modeling mesoscale cellular structures and drizzle in marine  
655 stratocumulus. Part II: The Microphysics and Dynamics of the Boundary Region between  
656 Open and Closed Cells, *J. Atmos. Sci.*, 66, 3257–3275, 2009.

657 Wang, H., Skamarock, W. C., and Feingold, G.: Evaluation of scalar advection schemes in the  
658 Advanced Research WRF model using large-eddy simulations of aerosol–cloud interactions,  
659 *Mon. Wea. Rev.*, **137**, 2547–2558, 2009.

660 Wang, X. Q., and Gong, Y. B.: The impact of an urban dry island on the summer heat wave and  
661 sultry weather in Beijing City, *Chinese Science Bulletin*, 55(16), 1657-1661, 2010.

662 Wang, Y., Zhuang, G., Zhang, X., Huang, K., Xu, C., Tang, A., Chen, J., An, Z.: The ion chemistry,  
663 seasonal cycle, and sources of PM<sub>2.5</sub> and TSP aerosol in Shanghai, *Atmos. Environ.*, 40(16),  
664 2935-2952, 2006.



665 Wang, K. C., Wang, J., Wang, P., Sparrow, M., Yang, J., Chen, H.: Influences of urbanization on  
 666 surface characteristics as derived from the Moderate-Resolution Imaging  
 667 Spectroradiometer: A case study for the Beijing metropolitan area, *J. Geophys. Res.*, 112.  
 668 D22S06, 2007.

669 Wang, X. M., Sun, X. G., Tang, J. P., and Yang, X. Q.: Urbanization-induced regional warming in  
 670 Yangtze River Delta: potential role of anthropogenic heat release, *Int. J. Climatol.*, doi:  
 671 10.1002/joc.4296, 2015.

672 Wienert, U., and Kuttler, W.: The dependence of the urban heat island intensity on latitude—a  
 673 statistical approach, *Meteorologische Zeitschrift*, 14(5), 677-686, 2005.

674 Wu, Kai, and Yang, X. Q.: Urbanization and heterogeneous surface warming in eastern China,  
 675 *Chinese Science Bulletin*, 58 (12), 1363-1373, 2013.

676 Yang, Ben, Zhang, Y. C., and Qian, Y.: Simulation of urban climate with high-resolution WRF  
 677 model: A case study in Nanjing, China, *Asia-Pacific J. Atmos. Sci.*, 48 (3), 227-241, 2012.

678 Yang, X., Hou, Y., Chen, B.: Observed surface warming induced by urbanization in east China, *J.*  
 679 *Geophys. Res.*, 116 (D14), 2011.

680 Yu, H., Kaufman, Y. J., Chin, M., et al.: A review of measurement-based assessments of the aerosol  
 681 direct radiative effect and forcing, *Atmos. Chem. Phys.*, 6 (3), 613-666, 2006.

682 Zhang, N., Gao, Z., Wang, X., Chen, Y.: Modeling the impact of urbanization on the local and  
 683 regional climate in Yangtze River Delta, China, *Theor. Appl. Climatol.*, 102(3-4): 331-342,  
 684 2010.

685 Zhang, Q., Hu, Y., Liu, J.: The trajectories of urban land and industrial land in Shanghai over the  
686 past 30 years, Urban Remote Sensing Event, 2009 Joint. IEEE , 2009a.

687 Zhang, Q., Streets, D. G., Carmichael, G. R., et al.: Asian emissions in 2006 for the NASA INTEX-  
688 B mission, Atmos. Chem. Phys., 9, 5131–5153, doi:10.5194/acp-9-5131-2009, 2009b.

689 Zhao, C., Tie, X., Lin, Y.: A possible positive feedback of reduction of precipitation and increase  
690 in aerosols over eastern central China, Geophys. Res. Lett., 33(11), 2006.

691 Zhao, C., Liu, X., Leung, L. R., Johnson, B., MaFarlane, S. A., Gustafson, W. I., Fast, J. D., Easter,  
692 R.: The spatial distribution of mineral dust and its shortwave radiative forcing over North  
693 Africa: modeling sensitivities to dust emissions and aerosol size treatments, Atmos. Chem.  
694 Phys., 11, 1879-1893, 2010.

695 Zhao, C., Liu, X., Leung, L. R., and Hagos, S.: Radiative impact of mineral dust on monsoon  
696 precipitation variability over West Africa, Atmos. Chem. Phys., 11, 1879-1893,  
697 doi:10.5194/acp-11-1879-2011, 2011.

698 Zhao, C., Leung, L. R., Easter, R., Hand, J., and Avise, J.: Characterization of speciated aerosol  
699 direct radiative forcing over California, J. Geophys. Res., 118, 2372–2388,  
700 doi:10.1029/2012JD018364, 2013a.

701 Zhao, C., Chen, S., Leung, L. R., Qian, Y., Kok, J., Zaveri, R., and Huang, J.: Uncertainty in  
702 modeling dust mass balance and radiative forcing from size parameterization, Atmos.  
703 Chem. Phys., 13, 10733–10753, 2013b.

704 Zhong, S., and Yang, X. Q.: Ensemble simulations of the urban effect on a summer rainfall event  
705 in the Great Beijing Metropolitan Area, Atmos. Res., 153, 318-334. 2015a.

706 Zhong, S, and Yang, X. Q.: Mechanism of urbanization impact on a summer cold frontal rainfall  
707 process in the Great Beijing Metropolitan Area, J. Appl. Meteorol. Climatol., doi:  
708 10.1175/JAMC-D-14-0264.1, 2015b.

709 Zhong, S., Qian, Y., Zhao, C., Leung, R., and Yang, X. Q.: A case study of urbanization impact on  
710 summer precipitation in the Greater Beijing Metropolitan Area: Urban heat island versus  
711 aerosol effects, J. Geophys. Res. Atmos., 120, doi:10.1002/2015JD023753, 2015.

712

713

714

715

716

717

718

719 **Table and Figure Captions**

720 **Table 1** Configurations of the WRF physics schemes used in the present study.

721 **Table 2** Numerical experiments and corresponding urban land use and aerosol emissions.

722 **Table 3** Analysis strategies for the investigation of urban land-use and/or aerosol effects.

723 **Figure 1** Land-use categories for year (a) 1970; (b) 2006; and (c)  $\text{SO}_2$  (units:  $\text{mol km}^{-2} \text{h}^{-1}$ ) and (d)  
724 black carbon (BC) emission rates (units:  $\text{ug m}^{-2} \text{s}^{-1}$ ) averaged over 2006-2010. Surface topography  
725 is also shown in Fig. 1a (contour; units: m). The boxes in Fig. 1b outline three mega-city clusters  
726 of Nanjing, Su-Xi-Chang, and Shanghai.

727 **Figure 2** Moving spatial anomalies of averaged surface skin temperature (units:  $^{\circ}\text{C}$ ) with a filtering  
728 window size of  $1^{\circ} \times 1^{\circ}$  for (a) MODIS observation and (b) the L06E06 simulation. The “High  
729 Intensity Residential” and “Commercial/Industrial/Transportation” areas are marked with green  
730 lines and yellow lines, respectively.

731 **Figure 3** Annual mean (a) near-surface temperature (units:  $^{\circ}\text{C}$ ) and (b) precipitation (units:  $\text{mm d}^{-1}$ )  
732 from observations (shaded circles) and the LU06E06 simulation (shaded).

733 **Figure 4** Differences in mean 2-m temperature (Units:  $^{\circ}\text{C}$ ) between simulations (a, d) LU06E70  
734 and LU70E70, (b, e) LU70E06 and LU70E70, (c, f) LU06E06 and LU70E70 for summer (upper  
735 panels) and winter (bottom panels). “Commercial/Industrial/Transportation” areas are marked with  
736 green lines. The black dots mark the area with statistically significant changes.

737 **Figure 5** Differences in net shortwave fluxes at the surface (units:  $\text{W m}^{-2}$ ) between simulations (a,  
738 c) LU06E70 and LU70E70, and (b, d) LU70E06 and LU70E70 in summer (upper panels) and  
739 winter (bottom panels).

740 **Figure 6** Differences in column burden of PM<sub>2.5</sub> ( $\text{g m}^{-2}$ ) between simulations LU70E06 and  
741 LU70E70, superimposed with near-surface winds simulated in LU70E70, for (a) summer and (b)  
742 winter.

743 **Figure 7** Differences in mean summertime (a) heat wave days (units: d/yr) and (b) heat stress  
744 (units:  $^{\circ}\text{C}$ ) between simulations LU06E70 and LU70E70.

745 **Figure 8** Diurnal cycles of the frequency of summertime extreme rainfall events for LU70E70  
746 (defined using hourly precipitation intensity above 95<sup>th</sup> percentile, black lines, right axis) and the  
747 differences between simulations over (a) Nanjing, (b) Shanghai, and (c) Su-Xi-Chang. Red lines  
748 are for Land use effect, blue lines for Aerosol effect, and green lines for the combined effect.

749 **Figure 9** Differences in the frequency of summertime extreme rainfall events (averaged from  
750 12:00 to 20:00 LST) between simulations (a) LU06E70 and LU70E70, and (b) LU70E06 and  
751 LU70E70.

752 **Figure 10** (a) Time-height cross-sections of differences (between LU06E70 and LU70E70) in  
753 temperature (contour; units:  $^{\circ}\text{C}$ ) and divergence (shade; units:  $10^{-5} \text{ s}^{-1}$ ) averaged over the three city  
754 clusters (Nanjing, Shanghai, and Su-Xi-Chang); (b) same as (a), but for vertical velocity (shade;  
755 units:  $10^{-2} \text{ m s}^{-1}$ ) and cloud water mixing ratio (contour;  $10^{-3} \text{ kg kg}^{-1}$ ).

756 **Figure 11** Time-height cross-sections of differences between LU70E06 and LU70E70 in radiative  
757 heating profile (shade; units:  $\text{K d}^{-1}$ ), vertical velocity (contour; units:  $10^{-2} \text{ m s}^{-1}$ ) and surface solar

758 radiation (blue bars; units:  $\text{W m}^{-2}$ ) averaged over the three city clusters (Nanjing, Shanghai, and  
759 Su-Xi-Chang).

760 **Figure 12** Rain rate (units:  $\text{mm h}^{-1}$ ) superimposed with wind vectors at 850 hPa for case A from  
761 08:00 LST 23 June to 08:00 LST 24 June 2006 (a) simulated in the LU06E06 simulation, (b)  
762 differences between LU06E70 and LU70E70, (c) differences between LU70E06 and LU70E70.  
763 Panels (d-f) are the same as (a-c) but for case B from 08:00 LST 1 July to 08:00 LST 2 July 2006.  
764 The boxes R1 in (a) and R2 in (d) outline the three regions over which further analysis are  
765 conducted. Lines across the center of each box mark the cross-sections to be analyzed.

766 **Figure 13** The time evolution of precipitation (units:  $\text{mm h}^{-1}$ ) along the line *ab* (marked in Fig.  
767 12a) from 08:00 LST 23 June to 02:00 LST 24 June 2006 (case A) (a) simulated in the LU06E06  
768 simulation, (b) differences between LU06E70 and LU70E70, (c) differences between LU70E06  
769 and LU70E70. Panels (d-f) are the same as (a-c) but for case B along line *cd* (marked in Fig. 12d)  
770 from 08:00 LST 1 July to 02:00 LST 2 July 2006.

771 **Figure 14** The time-height cross-sections of differences in moisture flux convergence (shaded;  
772 units:  $10^{-4} \text{ g}^{-1} \text{ kg}^{-1} \text{ s}^{-1}$ ) and water vapor mixing ratio (black lines; units:  $10^{-2} \text{ g kg}^{-1}$ ) from 08:00 LST  
773 23 June to 02:00 LST 24 June 2006 (case A) over region R1 (denoted in Fig. 12a) between (a)  
774 LU06E70 and LU70E70; (b) LU70E06 and LU70E70; Panels (c, d) are the same as (a, b) but for  
775 case B from 08:00 LST 1 July to 02:00 LST 2 July 2006 over R2 (denoted Fig. 12d).

776 **Figure 15** Same as Fig. 14 but for differences in the CON term (shaded; units:  $10^{-4} \text{ g}^{-1} \text{ kg}^{-1} \text{ s}^{-1}$ ) and  
777 MA term (black lines; units:  $10^{-4} \text{ g}^{-1} \text{ kg}^{-1} \text{ s}^{-1}$ ) in eq. (2).

778 **Figure 16** Same as Fig. 15 but for differences in the first term ( $-V_{\text{ctrl}} \cdot \Delta(\nabla q)$ ) (shaded; units:  $10^{-4}$   
779  $\text{g}^{-1} \text{kg}^{-1} \text{s}^{-1}$ ) and the second term ( $-(\nabla q)_{\text{ctrl}} \cdot \Delta V$ ) (black lines; units:  $10^{-4} \text{g}^{-1} \text{kg}^{-1} \text{s}^{-1}$ ) in Eq.3.
