# Supplementary material for: Urbanization-induced urban heat island and aerosol effects on climate extremes in the Yangtze River Delta Region of China
Source: Copernicus journal article supplement (doi:10.5194/acp-2016-953), 2016-12-22
Supplement: Supplementary file [file acp-2016-953-AC1-supplement.zip]

**Table 1** Configurations of the WRF physics schemes used in the present study.

| Physical processes               | Parameterization Scheme                                                 |
|----------------------------------|-------------------------------------------------------------------------|
| Microphysics                     | Morrison 2-moment scheme (Morrison et al., 2009)                        |
| Long-wave radiation              | RRTMG scheme (Iacono et al., 2008)                                      |
| Short-wave radiation             | RRTMG scheme                                                            |
| Surface layer                    | Monin-Obukhov scheme (Monin and Obukhov, 1954)                          |
| Land surface process             | Noah land-surface model (Chen et al., 1996; Chen and Dudhia, 2001)      |
| Planetary boundary layer process | Mellor-Yamada-Jajic TKE scheme (Mellor and Yamada, 1982; Janijic, 2001) |

**Table 2** Numerical experiments and corresponding urban land use and aerosol emissions.

| Experiment | Land-use category | Anthropogenic emissions |
|------------|-------------------|-------------------------|
| LU06E06    | 2006              | 2006                    |
| LU70E06    | 1970              | 2006                    |
| LU70E70    | 1970              | 1970                    |

**Table 3** Analysis strategies for the investigation of urban land-use and/or aerosol effects.

| Difference       | Mechanism         |
|------------------|-------------------|
| LU06E06- LU70E06 | Urban             |
| LU70E06- LU70E70 | Aerosol           |
| LU06E06- LU70E70 | Urban and aerosol |

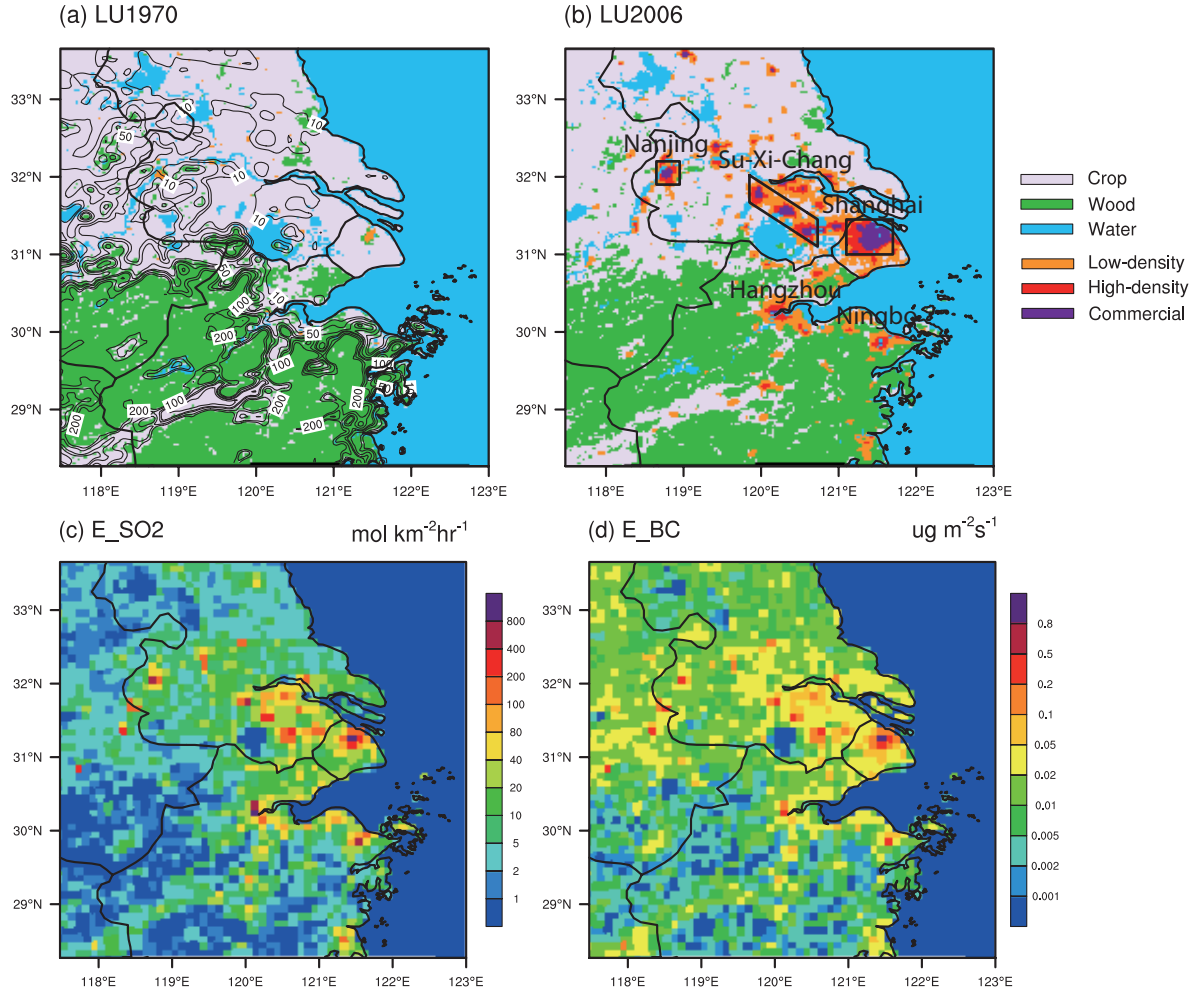

**Figure 1** Land-use categories for year (a) 1970; (b) 2006; and (c) SO<sub>2</sub> (units: mol km<sup>-2</sup> h<sup>-1</sup>) and (d) black carbon (BC) emission rates (units: ug m<sup>-2</sup> s<sup>-1</sup>) averaged over 2006-2010. The topography is also shown in Fig. 1a (contour; units: m). The boxes in Fig. 1b outline three mega-city clusters of Nanjing, Su-Xi-Chang, and Shanghai.

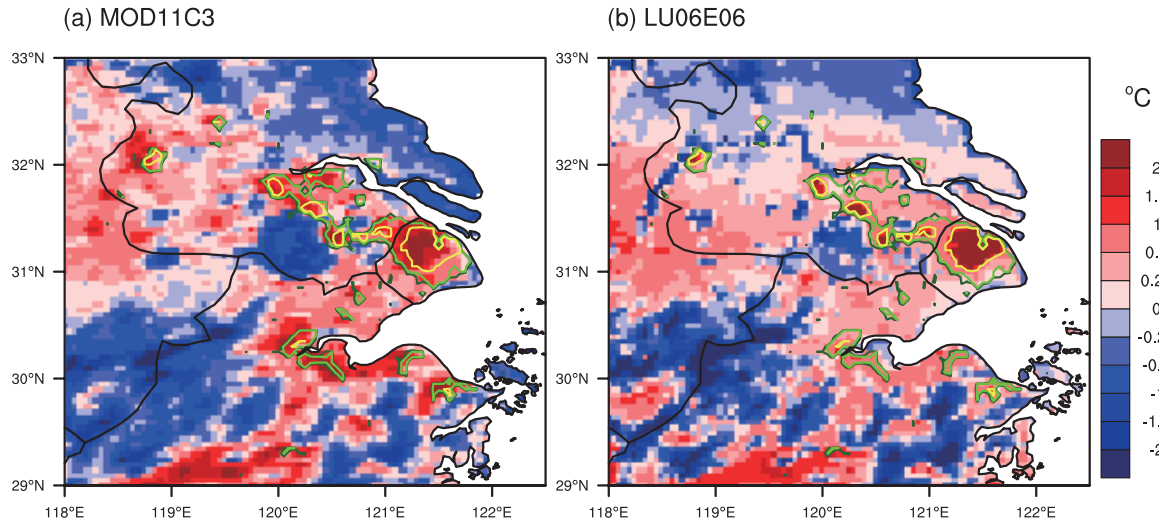

**Figure 2** Moving spatial anomalies of averaged surface skin temperature (units: °C) with a filtering window size of  $1^{\circ} \times 1^{\circ}$  for (a) MODIS observation and (b) the L06E06 simulation. The “High Intensity Residential” and “Commercial/Industrial/Transportation” areas are marked with green lines and yellow lines, respectively.

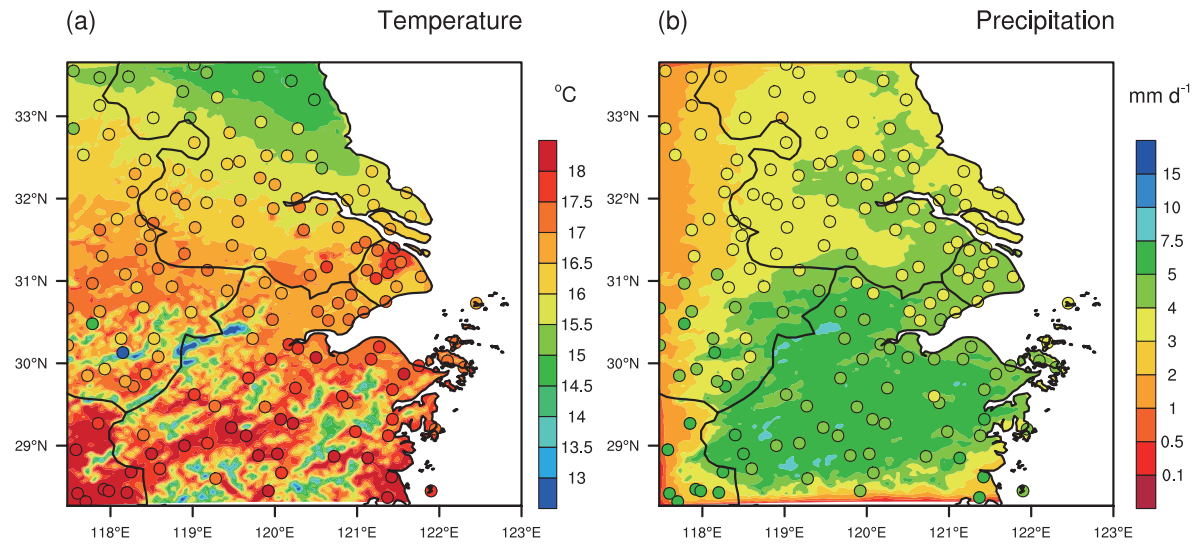

**Figure 3** Annual mean (a) near-surface temperature (units: °C) and (b) precipitation (units: mm d<sup>-1</sup>) from observations (shaded circles) and simulation of the LU06E06 (shaded).

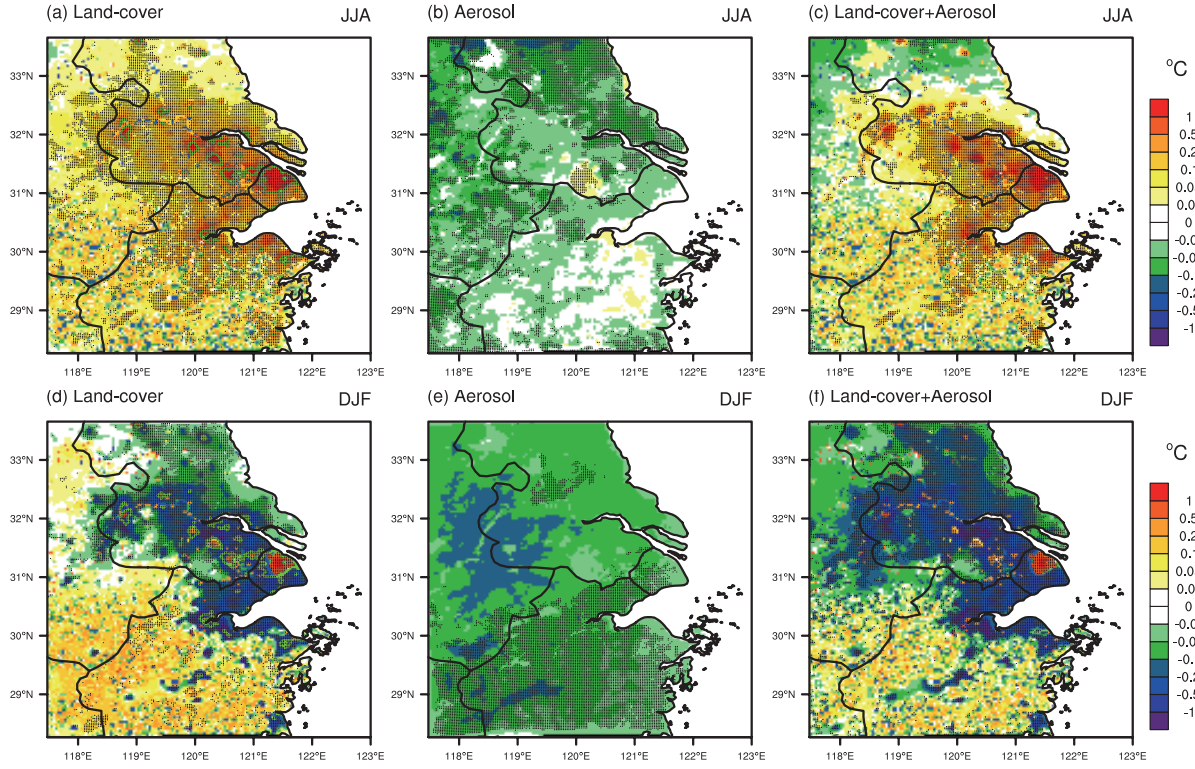

**Figure 4** Differences in mean 2-m temperature (Units: °C) between simulations (a, d) LU06E70 and LU70E70, (b, e) LU70E06 and LU70E70, (c, f) LU06E06 and LU70E70 for summer (upper panels) and winter (bottom panels). “Commercial/Industrial/Transportation” areas are marked with green lines. The black dots mark the area with statistically significant changes.

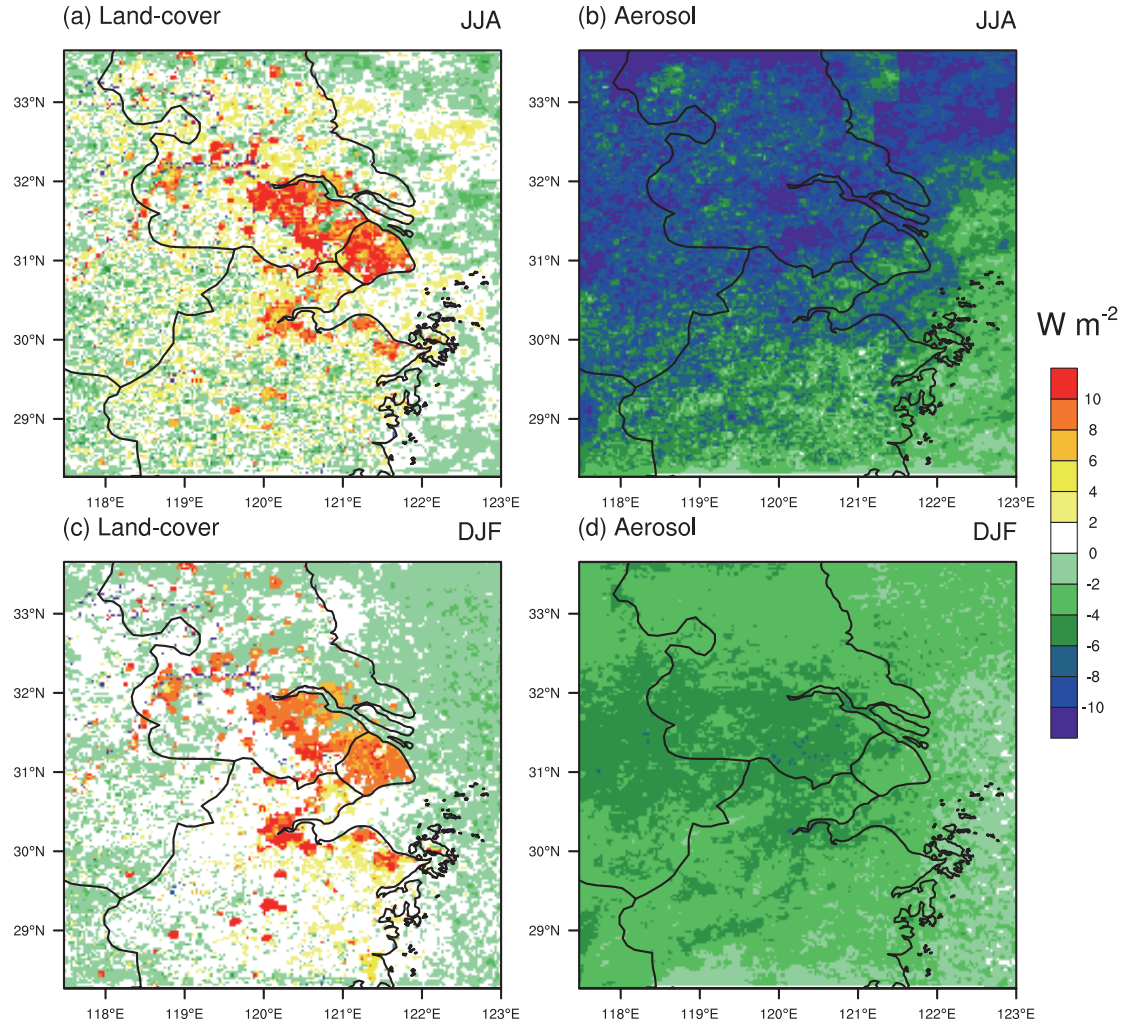

**Figure 5** Differences in net shortwave fluxes at the surface (units:  $\text{W m}^{-2}$ ) between simulations (a, c) LU06E70 and LU70E70, and (b, d) LU70E06 and LU70E70 in summer (upper panels) and winter (bottom panels).



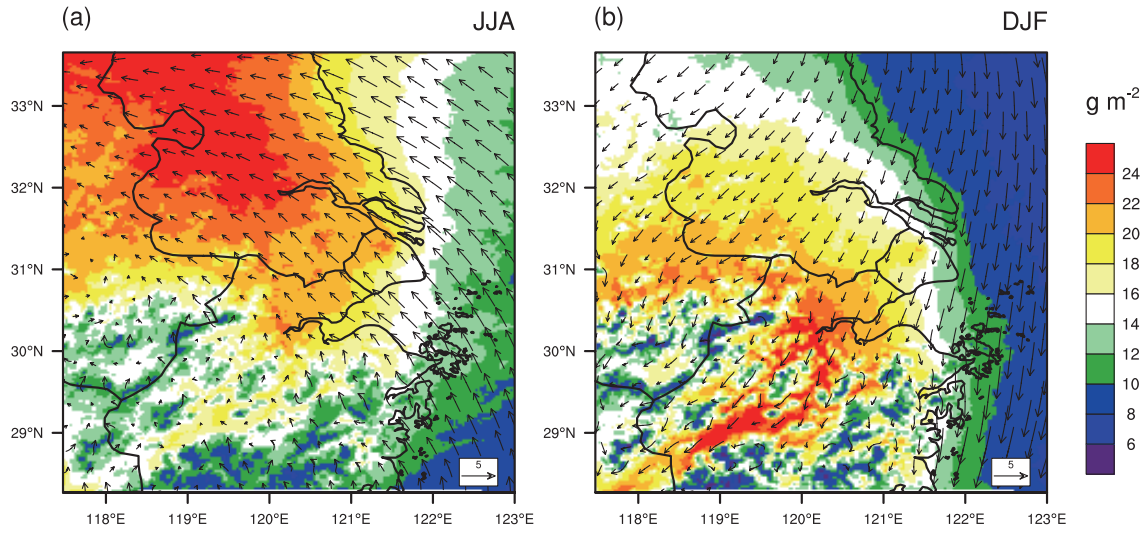

**Figure 6** Differences in column burden of PM<sub>2.5</sub> (g m<sup>-2</sup>) between simulations LU70E06 and LU70E70, superimposed with near-surface winds simulated in LU70E70, for (a) summer and (b) winter.

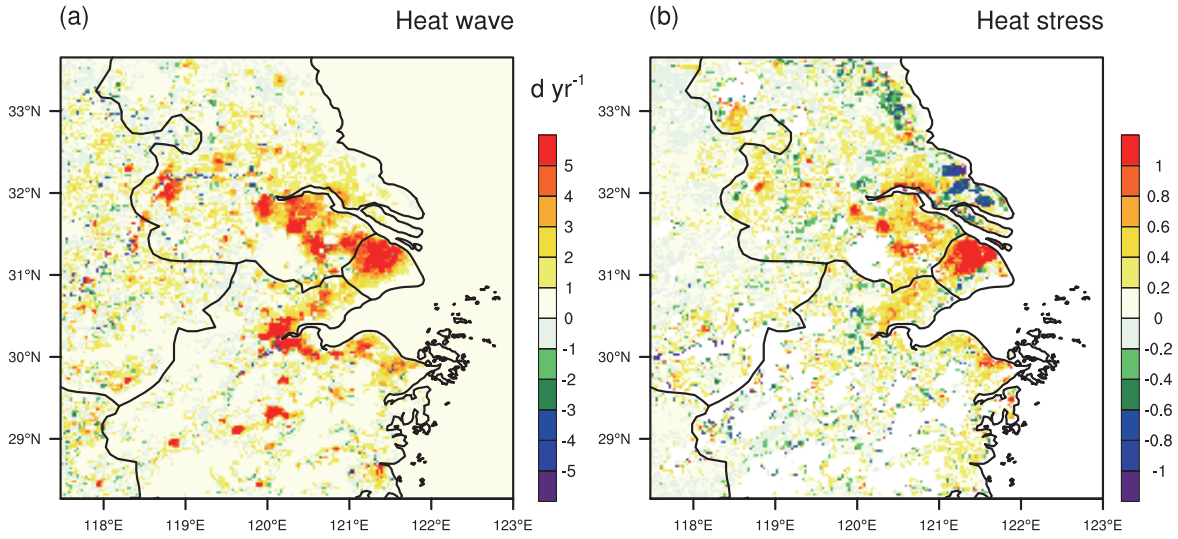

**Figure 7** Differences in mean summertime (a) heat wave days (units: d/yr) and (b) heat stress (units: °C) between simulations LU06E70 and LU70E70.

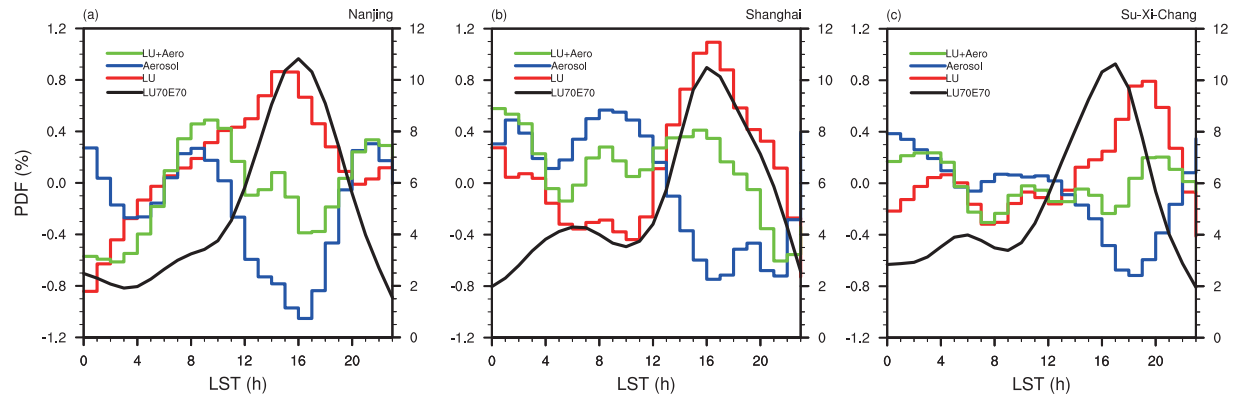

**Figure 8** Diurnal cycles of the frequency of summertime extreme rainfall events for LU70E70 (defined using hourly precipitation intensity above 95<sup>th</sup> percentile, black lines, right axis) and the differences between simulations over (a) Nanjing, (b) Shanghai, and (c) Su-Xi-Chang. Red lines are for land use effect, blue lines for aerosol effect, and green lines for the combined effect.

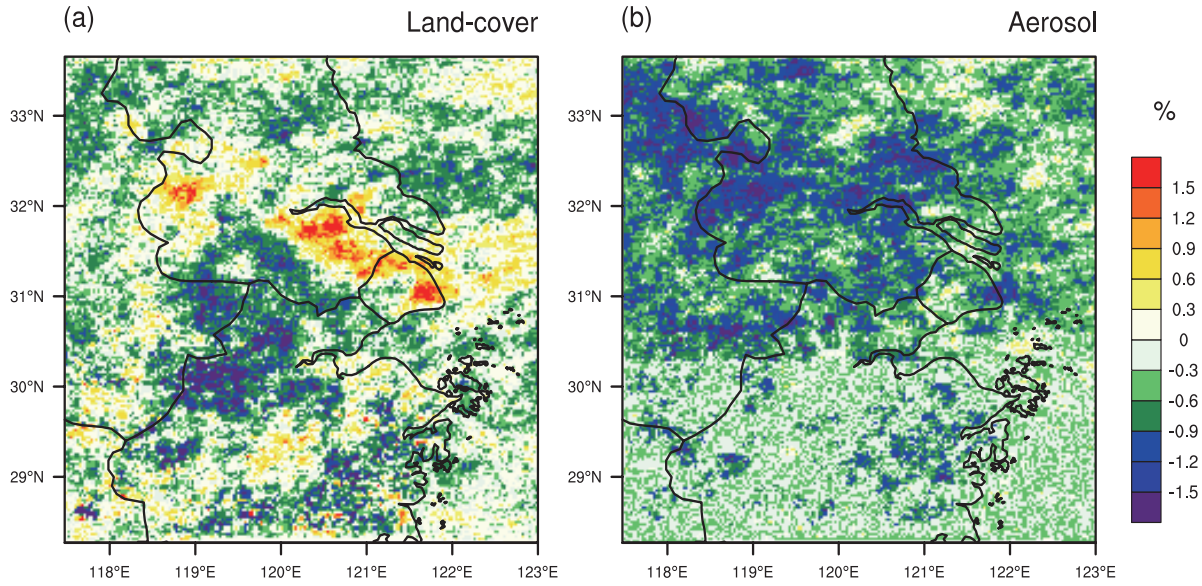

**Figure 9** Differences in the frequency of summertime extreme rainfall events (averaged from 12:00 to 20:00 LST) between simulations (a) LU06E70 and LU70E70, and (b) LU70E06 and LU70E70.

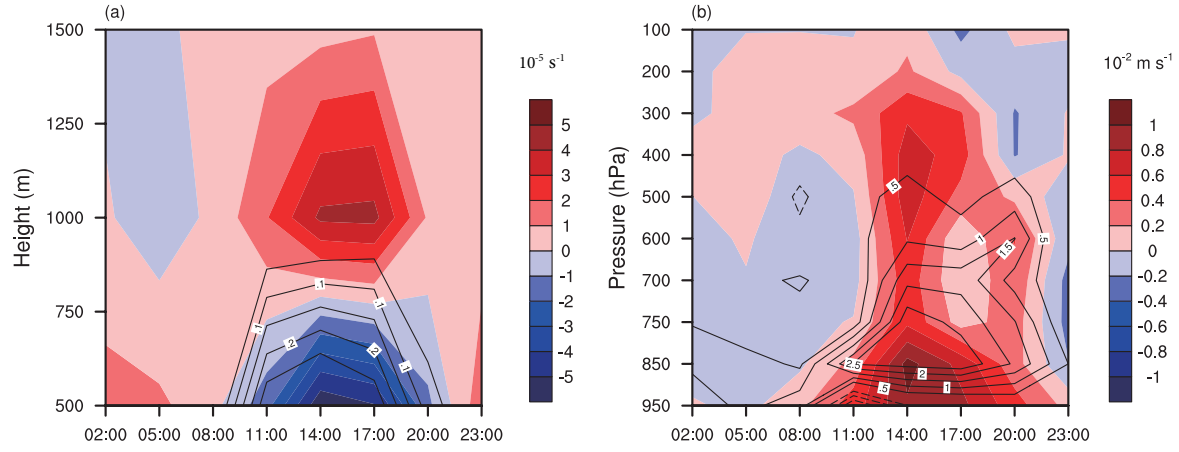

**Figure 10** (a) Time-height cross-sections of differences (between LU06E70 and LU70E70) in temperature (contour; units:  $^{\circ}\text{C}$ ) and divergence (shade; units:  $10^{-5} \text{ s}^{-1}$ ) averaged over the three city clusters (Nanjing, Shanghai, and Su-Xi-Chang); (b) same as (a), but for vertical velocity (shade; units:  $10^{-2} \text{ m s}^{-1}$ ) and cloud water mixing ratio (contour;  $10^{-3} \text{ kg kg}^{-1}$ ).

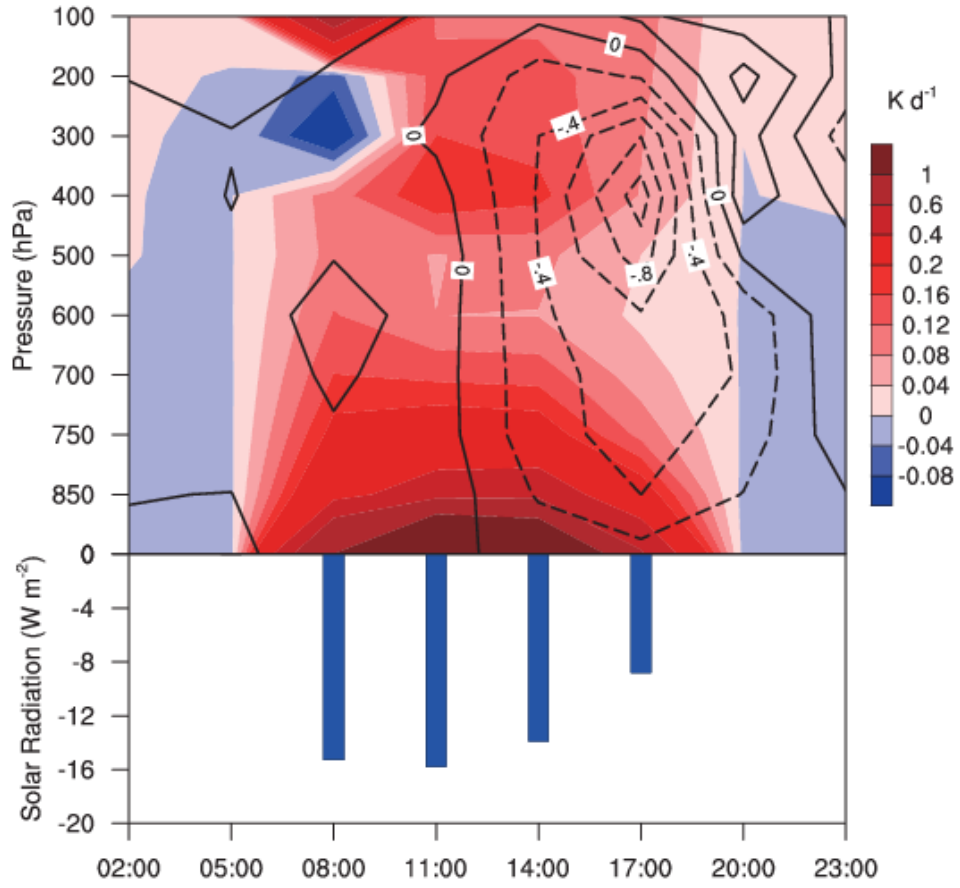

**Figure 11** Time-height cross-sections of differences (between LU70E06 and LU70E70) in radiative heating profile (shade; units:  $K d^{-1}$ ), vertical velocity (contour; units:  $10^{-2} m s^{-1}$ ) and surface solar radiation (blue bars; units:  $W m^{-2}$ ) averaged over the three city clusters (Nanjing, Shanghai, and Su-Xi-Chang).

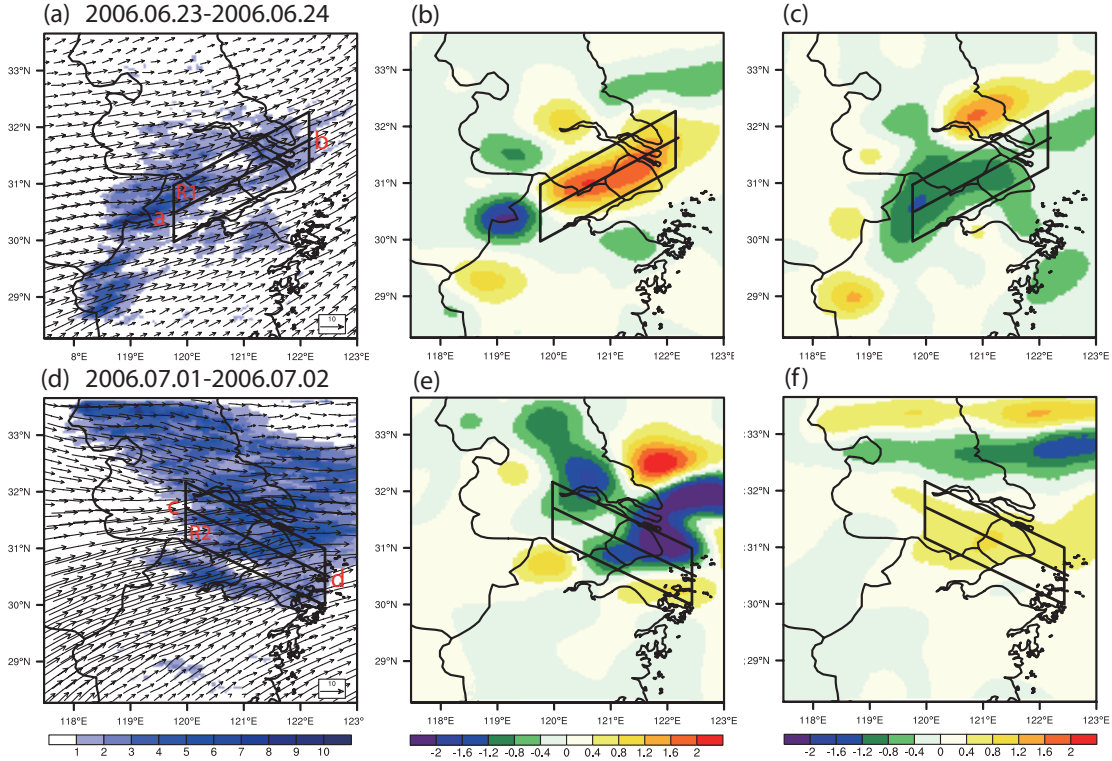

**Figure 12** Rain rate (units: mm h<sup>-1</sup>) superimposed with wind vectors at 850 hPa for case A from 08:00 LST 23 June to 08:00 LST 24 June 2006 (a) simulated in the LU06E06 simulation, (b) differences between LU06E70 and LU70E70, (c) differences between LU70E06 and LU70E70. Panels (d-f) are the same as (a-c) but for case B from 08:00 LST 1 July to 08:00 LST 2 July 2006. The boxes R1 in (a), R2 in (d) outline the three regions over which further analysis are conducted. Lines across the center of each box mark the cross-sections to be analyzed.

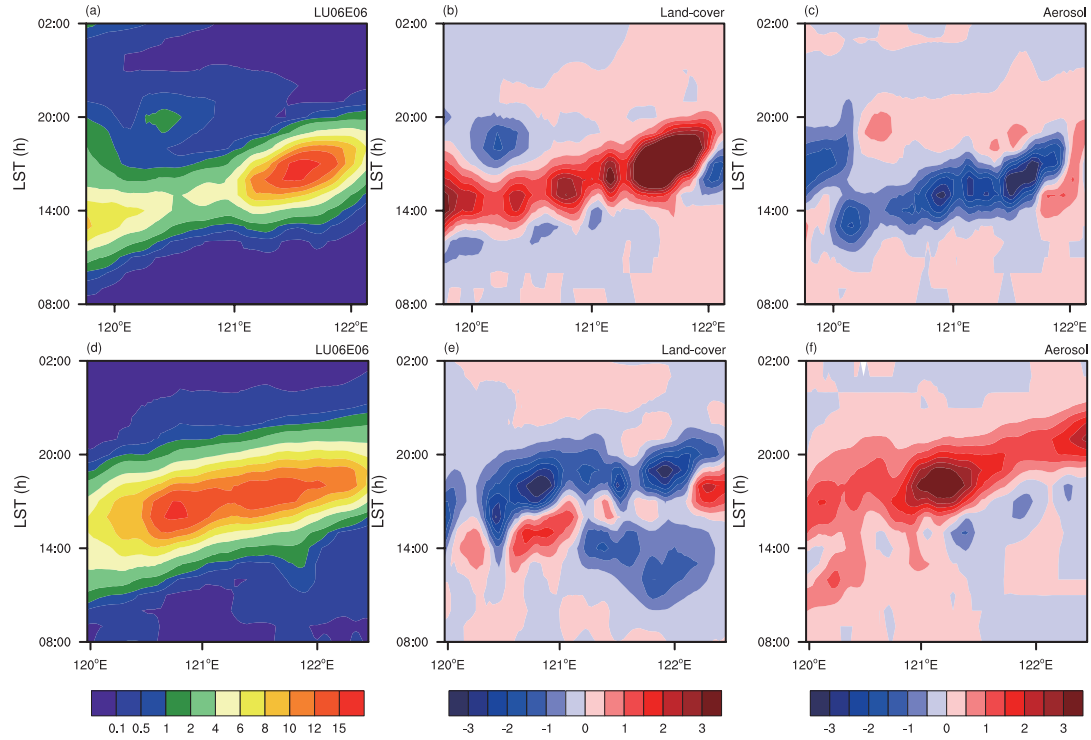

**Figure 13** The time evolution of precipitation (units: mm h<sup>-1</sup>) along the line *ab* (marked in Fig. 12a) from 08:00 LST 23 June to 02:00 LST 24 June 2006 (case A) (a) simulated in the LU06E06 simulation, (b) differences between LU06E70 and LU70E70, (c) differences between LU70E06 and LU70E70. Panels (d-f) are the same as (a-c) but for case B along line *cd* (marked in Fig. 12d) from 08:00 LST 1 July to 02:00 LST 2 July 2006.



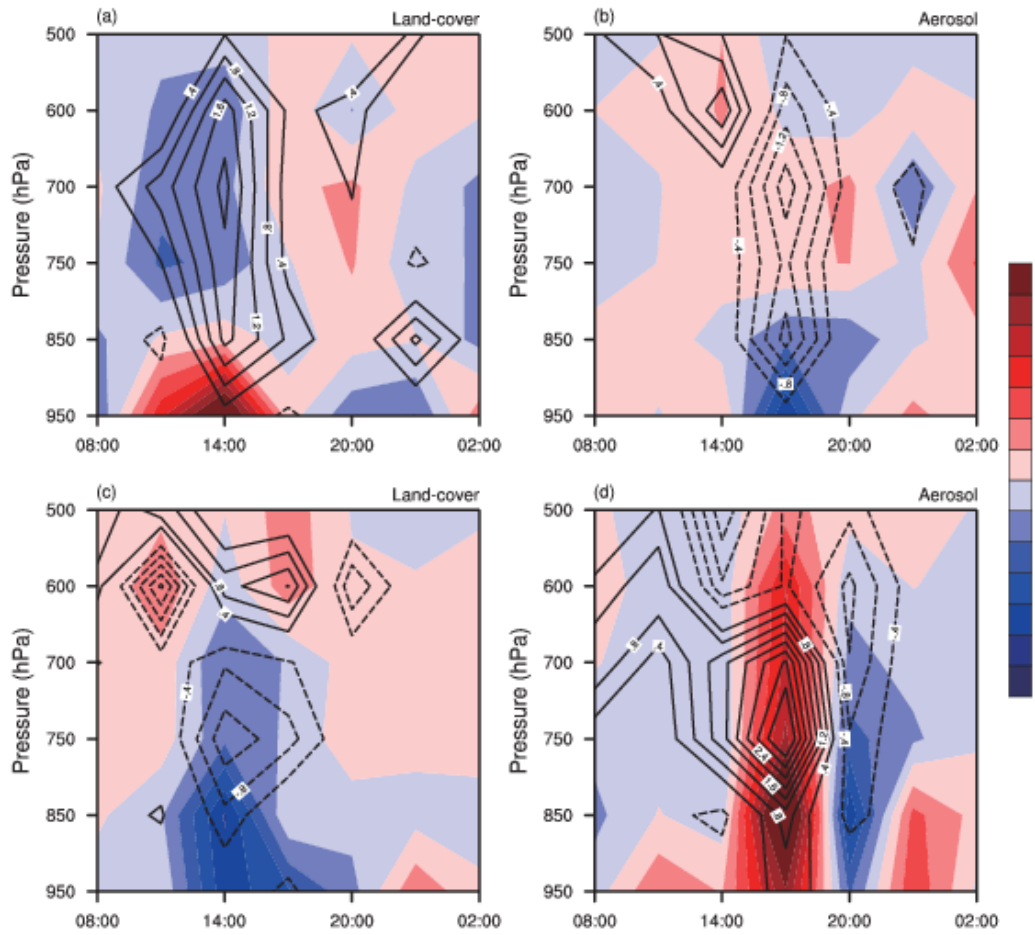

**Figure 14** Time-height cross-sections of differences in moisture flux convergence (shaded; units:  $10^{-4} \text{ g}^{-1} \text{ kg}^{-1} \text{ s}^{-1}$ ) and water vapor mixing ratio (black lines; units:  $10^{-2} \text{ g kg}^{-1}$ ) from 08:00 LST 23 June to 02:00 LST 24 June 2006 (case A) over region R1 (denoted in Fig. 12a) between (a) LU06E70 and LU70E70; (b) LU70E06 and LU70E70; Panels (c, d) are the same as (a, b) but for case B from 08:00 LST 1 July to 02:00 LST 2 July 2006 over R2 (denoted in Fig. 12d).

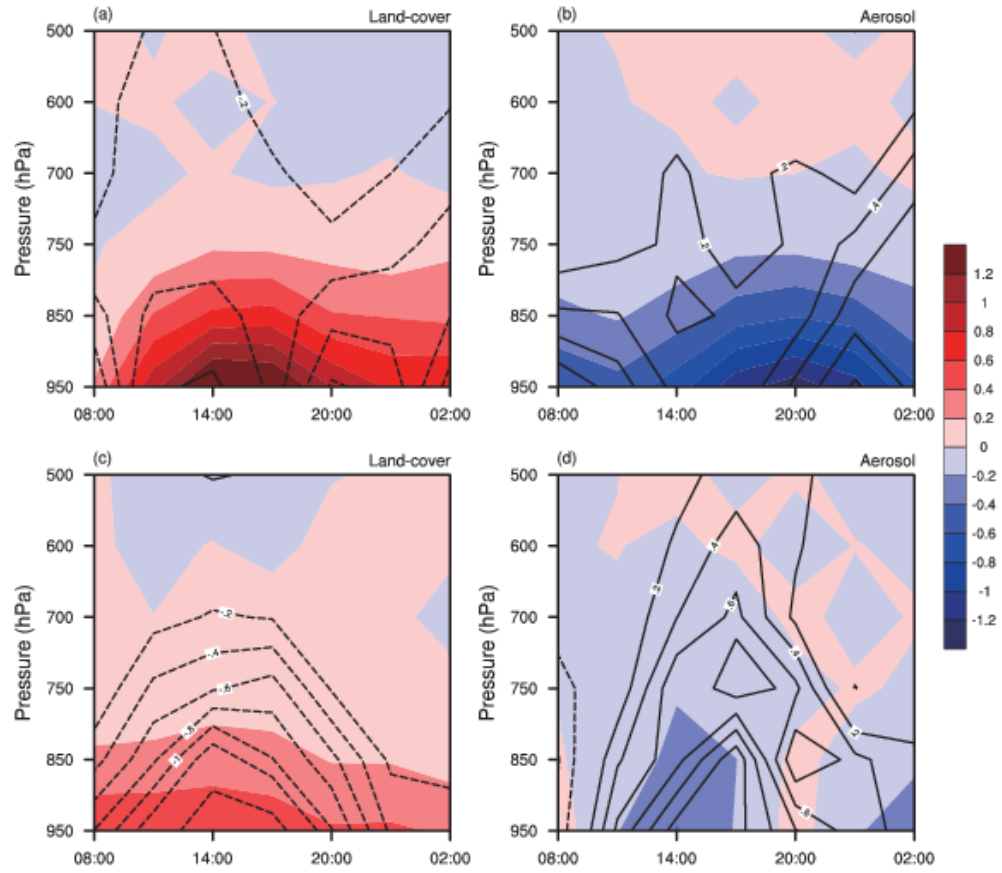

**Figure 15** Same as Fig. 14 but for differences in the CON term (shaded; units:  $10^{-4} \text{ g}^{-1} \text{ kg}^{-1} \text{ s}^{-1}$ ) and MA term (black lines; units:  $10^{-4} \text{ g}^{-1} \text{ kg}^{-1} \text{ s}^{-1}$ ) in eq. (2).

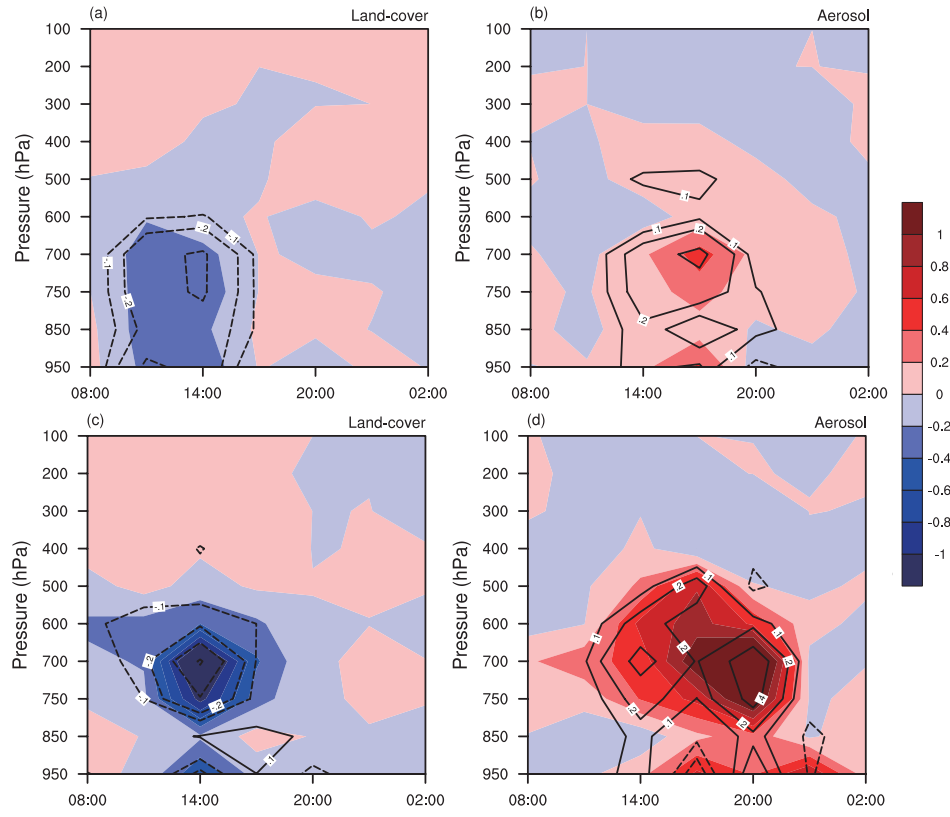

**Figure 16** Same as Fig. 15 but for differences in the first term  $(-V_{ctrl} \cdot \Delta(\nabla q))$  (shaded; units:  $10^{-4} \text{ g}^{-1} \text{ kg}^{-1} \text{ s}^{-1}$ ) and the second term  $(-(\nabla q)_{ctrl} \cdot \Delta V)$  (black lines; units:  $10^{-4} \text{ g}^{-1} \text{ kg}^{-1} \text{ s}^{-1}$ ) in Eq.3.
